# Supplementary material for: Tumor-associated macrophages and PD-L1 in prostate cancer: a possible key to unlocking immunotherapy efficacy
Source: Aging (Albany NY). 2024 Jan 4;16(1):445–65. doi: 10.18632/aging.205378 (PMC10817380; doi:10.18632/aging.205378)
Supplement: Supplementary Table 1 [file aging-16-205378-s002.xlsx]

## Sheet: clinical_TCGA
Supplementary Table 1. Clinical Characteristics of TCGA-PRAD cohort.
ID	PFS	Survival (0=live, 1=survive)	Gender	Pathologic T stage	Clinical M stage	Pathologic N stage	Clinical T stage	Gleason_score	PSA VALUE	Age
TCGA-2A-A8VO	1701	0	MALE	T3a	M0	Unknown	T1c	6	0.05	57
TCGA-EJ-A65G	666	0	MALE	T2c	M0	N0	T2c	8	0.1	57
TCGA-YL-A8SR	273	0	MALE	T3a	M0	N0	T1c	9	0.06	64
TCGA-QU-A6IL	97	0	MALE	T2c	M0	N0	T2a	7	0.2	64
TCGA-ZG-A9LS	516	0	MALE	T3b	M0	N1	T2a	9	0.03	64
TCGA-G9-6329	1266	0	MALE	T2c	M0	Unknown	T1c	7	0.03	67
TCGA-KK-A7AY	1124	1	MALE	T2c	M0	N0	T2a	7	0.2	60
TCGA-CH-5762	1339	0	MALE	T3b	M0	N0	Unknown	7	0.01	60
TCGA-KK-A7AU	207	1	MALE	T3b	M0	N1	T2b	9	0	63
TCGA-YL-A9WI	1623	0	MALE	T3a	M0	N1	Unknown	9	0.03	63
TCGA-XK-AAJT	1434	0	MALE	T3a	M0	N0	T1c	7	0.09	75
TCGA-EJ-A6RC	873	0	MALE	Unknown	M0	N0	T1c	7	0.1	64
TCGA-EJ-7784	781	0	MALE	T2c	M0	N0	T2c	7	0.1	63
TCGA-FC-7961	469	0	MALE	T3a	M0	N0	T1c	9	Unknown	62
TCGA-EJ-A7NN	197	1	MALE	T3b	M0	N1	T3b	7	0.3	61
TCGA-EJ-5506	1381	0	MALE	T3b	M0	N1	T3b	8	0.1	67
TCGA-EJ-7218	2542	0	MALE	T2c	M0	N0	T2a	7	0.1	71
TCGA-Y6-A8TL	992	0	MALE	T3a	Unknown	N0	T2a	6	0	65
TCGA-VN-A88K	776	0	MALE	T3a	M0	N1	T1c	8	0	58
TCGA-EJ-A65D	393	0	MALE	T3a	M0	N0	T3a	8	0.1	66
TCGA-HC-7748	792	0	MALE	T2a	Unknown	N0	Unknown	6	0.1	60
TCGA-2A-AAYU	615	0	MALE	T3a	M0	N0	T1c	6	0.05	56
TCGA-2A-A8W1	112	0	MALE	T3a	M0	N0	T1c	7	0.05	54
TCGA-FC-A4JI	877	0	MALE	T3a	M0	Unknown	T4	8	Unknown	70
TCGA-VN-A88O	481	0	MALE	T2c	M0	N0	T1c	7	0	49
TCGA-HC-A6HY	134	0	MALE	T2c	M0	Unknown	T1c	7	Unknown	51
TCGA-KC-A4BR	1022	1	MALE	T3b	M0	N1	T2	9	0	75
TCGA-YL-A9WJ	1476	1	MALE	T3b	M0	N1	T4	8	3.1	47
TCGA-VN-A88N	766	0	MALE	T2c	M0	N0	T1c	7	0	62
TCGA-HC-8261	546	0	MALE	T2c	Unknown	Unknown	Unknown	7	Unknown	48
TCGA-J4-A67M	941	0	MALE	T3a	M0	N0	T2a	7	0.1	55
TCGA-FC-A6HD	789	0	MALE	T3a	M0	N0	T3a	7	Unknown	77
TCGA-HC-A6AO	530	0	MALE	T2c	M0	Unknown	T1c	7	Unknown	52
TCGA-CH-5739	671	0	MALE	T3a	M0	N0	Unknown	7	0.02	65
TCGA-G9-6379	1778	0	MALE	T3b	M0	N0	T1b	7	0.03	68
TCGA-G9-6343	2450	0	MALE	T2c	M0	Unknown	T2a	7	0.03	62
TCGA-HC-8216	682	0	MALE	T3a	M0	N0	T2a	7	0.19	58
TCGA-YL-A8SB	1384	1	MALE	T3a	M0	N0	Unknown	9	0.23	62
TCGA-J4-AAU2	825	0	MALE	T2c	M0	N0	Unknown	6	0	59
TCGA-J9-A8CL	132	1	MALE	T3b	M0	Unknown	T3a	9	12.01	66
TCGA-KK-A8I4	1162	1	MALE	T3b	M0	N1	T2c	7	0.2	64
TCGA-V1-A9OA	636	0	MALE	T3b	M0	N1	T2c	9	0.01	61
TCGA-KK-A8IF	648	1	MALE	T3a	M0	N0	T2a	7	0.7	57
TCGA-KK-A7B1	1063	0	MALE	T3a	M0	N0	T1c	7	0.1	65
TCGA-VP-AA1N	1365	0	MALE	T3a	M0	N0	T1c	9	0.01	70
TCGA-XK-AAIW	427	1	MALE	T3b	M0	N0	T2b	9	0.09	78
TCGA-ZG-A9L5	908	0	MALE	T4	M0	N1	T2a	9	Unknown	58
TCGA-G9-7522	1078	0	MALE	T2c	M0	N0	T1c	7	0.1	49
TCGA-J4-A67N	442	1	MALE	T3a	M0	N0	T2a	7	0.7	61
TCGA-HC-A6AL	67	0	MALE	T2c	M0	N0	T1c	7	Unknown	64
TCGA-EJ-8469	1925	1	MALE	T3a	M0	N0	T3a	9	3.1	46
TCGA-EJ-A46D	626	0	MALE	T2c	M0	N0	T2c	8	0.03	53
TCGA-G9-6367	1222	0	MALE	T3a	M0	N0	T2b	9	0.42	60
TCGA-VP-A87E	2037	0	MALE	T2c	M0	N0	T1c	6	0.11	59
TCGA-HC-A4ZV	23	0	MALE	T3b	Unknown	N0	T2c	9	Unknown	56
TCGA-G9-6373	811	0	MALE	T3a	M0	Unknown	T2b	7	Unknown	68
TCGA-HC-8258	847	0	MALE	T2c	Unknown	N0	Unknown	6	0.01	56
TCGA-G9-6370	1156	0	MALE	T3b	M0	N0	T1c	7	0.03	52
TCGA-VP-A87J	1774	0	MALE	T3a	M0	N1	T2a	7	0.13	56
TCGA-CH-5763	365	0	MALE	T3a	M0	N0	Unknown	7	0.1	66
TCGA-ZG-A9NI	132	0	MALE	T3b	M0	N0	T2a	9	0.03	73
TCGA-KK-A6E4	3502	0	MALE	T2b	M0	N0	T1c	7	0.1	69
TCGA-EJ-A7NF	250	0	MALE	T2c	M0	N0	T2c	7	0.1	56
TCGA-KC-A4BN	1815	0	MALE	T2a	M0	N0	T1c	7	0	55
TCGA-J4-A83M	521	1	MALE	T2c	M0	N0	T2c	7	0.2	64
TCGA-EJ-5517	1889	0	MALE	T2c	M0	N0	T1c	6	0.1	55
TCGA-CH-5754	62	0	MALE	T3b	M0	N1	Unknown	9	37.36	65
TCGA-EJ-A46H	724	0	MALE	T2c	M0	N0	T1c	7	0.1	60
TCGA-2A-AAYF	1364	0	MALE	T3a	M0	Unknown	T1c	7	0.05	57
TCGA-YL-A8HK	1376	1	MALE	T3b	M0	N0	Unknown	9	1	59
TCGA-2A-A8VX	1378	0	MALE	T3b	M0	N0	T2c	8	0.05	70
TCGA-HC-A48F	680	0	MALE	T2c	M0	N1	T1c	8	Unknown	47
TCGA-FC-A66V	524	0	MALE	T3b	M0	N0	T3b	7	10.8	74
TCGA-HC-7736	1103	0	MALE	T2c	M0	N0	T2b	7	0.02	59
TCGA-V1-A9O9	2870	0	MALE	T3b	M0	N0	Unknown	8	5.04	56
TCGA-CH-5789	304	0	MALE	T3a	M0	N0	Unknown	7	0.02	61
TCGA-HC-A8D1	573	0	MALE	T2c	M0	N0	T2	7	0.01	68
TCGA-EJ-8468	2347	0	MALE	T3a	Unknown	N0	T3a	8	0.1	63
TCGA-V1-A9O5	124	1	MALE	T4	M0	N1	T2b	9	3.26	64
TCGA-V1-A9ZK	1383	0	MALE	T3b	M0	N0	T2a	8	0.01	68
TCGA-KC-A7FE	352	0	MALE	T2c	M0	N0	T1c	7	0	62
TCGA-Y6-A9XI	526	0	MALE	Unknown	Unknown	N0	Unknown	8	0.06	72
TCGA-HC-7210	868	0	MALE	T2a	Unknown	N0	Unknown	7	0.1	74
TCGA-G9-6336	2068	0	MALE	Unknown	M0	N0	T2c	7	0.1	57
TCGA-KK-A6E2	5024	0	MALE	T2c	M0	N0	T2a	7	0.1	54
TCGA-KK-A5A1	203	1	MALE	T3b	M0	N0	T3a	9	0.1	72
TCGA-EJ-A7NK	476	0	MALE	T3a	M0	N0	T3a	7	0.1	58
TCGA-2A-AAYO	1272	0	MALE	T2c	M0	Unknown	T1c	6	0.05	57
TCGA-V1-A9ZI	1640	0	MALE	T3b	M0	N0	Unknown	9	3.11	68
TCGA-G9-A9S4	906	0	MALE	T3b	M0	N1	T2a	8	0.03	62
TCGA-VP-A872	3631	0	MALE	T3a	M0	N0	T2	8	0.01	60
TCGA-KK-A7B0	606	1	MALE	T3b	M0	N0	T2b	9	0.1	67
TCGA-J4-8198	614	0	MALE	T3b	M0	Unknown	T1c	7	0.1	49
TCGA-HC-7819	543	0	MALE	T2c	M0	N0	T2c	8	0.01	53
TCGA-HC-8259	924	0	MALE	T2a	M0	Unknown	T1c	6	0.01	50
TCGA-EJ-5511	1476	0	MALE	T3a	M0	N0	T2b	7	0.04	55
TCGA-EJ-5495	1760	0	MALE	T3b	M0	N1	T1c	8	0.13	68
TCGA-ZG-A9L2	180	1	MALE	T3b	M0	N0	T3a	9	0.01	70
TCGA-EJ-A7NJ	197	0	MALE	T2c	M0	N0	T2c	8	0.1	59
TCGA-G9-6353	1542	0	MALE	T3a	M0	Unknown	T1c	7	0.1	58
TCGA-HC-7821	956	0	MALE	T3b	M0	N1	Unknown	8	0.01	54
TCGA-V1-A9OX	1134	0	MALE	T2c	M0	N0	Unknown	8	0.04	56
TCGA-EJ-7782	1167	0	MALE	T2c	M0	N0	T2c	8	0.1	71
TCGA-V1-A8MG	857	0	MALE	T3b	M0	Unknown	T2c	7	0.03	53
TCGA-XK-AAJP	1259	0	MALE	T3a	M0	N0	T1c	7	0.09	66
TCGA-EJ-A46I	668	0	MALE	T3a	M0	N0	T1c	7	0.1	57
TCGA-G9-A9S7	728	0	MALE	T3a	M0	N0	T2a	8	0.13	55
TCGA-HC-A76W	213	0	MALE	T3b	M0	N0	T2	7	0.01	73
TCGA-EJ-AB20	131	0	MALE	T2c	M0	N0	T2c	6	0.1	61
TCGA-EJ-A7NM	128	0	MALE	T3b	M0	N1	T3b	9	0.1	64
TCGA-V1-A8X3	202	0	MALE	T2c	M0	N0	T1c	7	0.03	51
TCGA-HC-A8CY	290	0	MALE	T3a	M0	N1	T1c	9	0.9	63
TCGA-VN-A88I	269	0	MALE	T3a	M0	N0	T1c	8	0.16	59
TCGA-HC-7740	717	0	MALE	T2c	M0	N0	T2a	7	0	59
TCGA-KK-A6E7	925	1	MALE	T3a	M0	N1	T1c	9	0.1	46
TCGA-KK-A7B4	637	1	MALE	T3b	M0	N1	T3b	9	0.6	64
TCGA-YL-A9WX	1506	1	MALE	T3b	M0	N1	T3a	9	0.76	68
TCGA-CH-5744	60	0	MALE	T2c	M0	N0	Unknown	7	9.63	64
TCGA-J4-AATZ	79	1	MALE	T3a	M0	N0	Unknown	9	0	66
TCGA-HC-8266	473	0	MALE	T3b	M0	N0	Unknown	8	Unknown	55
TCGA-EJ-7781	1073	0	MALE	T2c	M0	N0	T1c	7	0.1	65
TCGA-KK-A8I9	940	1	MALE	T3a	M0	N0	T2b	8	0.1	61
TCGA-YL-A8SA	512	0	MALE	T3b	M0	N0	T2b	8	0.06	69
TCGA-HC-A6AN	49	0	MALE	T3a	M0	N0	T1c	7	Unknown	67
TCGA-HC-8262	679	0	MALE	T2c	Unknown	N0	Unknown	8	0.1	57
TCGA-EJ-A46B	657	0	MALE	T3a	M0	N0	T1c	8	0.1	66
TCGA-KK-A59Y	1968	0	MALE	T3a	M0	N1	T3a	9	0.1	56
TCGA-EJ-8470	1159	0	MALE	T2c	M0	N0	T2c	7	Unknown	58
TCGA-XK-AAIR	972	0	MALE	T2c	M0	N0	T1c	8	0.09	75
TCGA-KK-A6E0	941	1	MALE	T3a	M0	N0	T2b	9	0.3	59
TCGA-G9-7509	1610	0	MALE	T2c	M0	Unknown	T1c	6	0.03	48
TCGA-HC-7817	928	0	MALE	T3b	M0	Unknown	Unknown	7	0.1	52
TCGA-CH-5761	28	0	MALE	T3b	M0	N0	Unknown	9	8.49	61
TCGA-ZG-A8QZ	308	0	MALE	T3b	M0	N1	T2a	9	0.01	65
TCGA-G9-6356	1434	0	MALE	T3b	M0	N0	T1c	9	0.13	60
TCGA-G9-6333	2465	0	MALE	T2c	M0	N0	T1c	7	0.03	66
TCGA-EJ-7794	1306	0	MALE	T2c	M0	N0	T2c	7	0.1	67
TCGA-ZG-A9LB	583	0	MALE	T3b	M0	N0	T2a	9	0.02	72
TCGA-XK-AAK1	979	0	MALE	T2c	M0	N0	T1c	7	0.09	62
TCGA-YL-A8S9	1006	1	MALE	T3a	M0	N0	Unknown	9	0.03	63
TCGA-J4-8200	1218	0	MALE	T2c	M0	N0	T2	7	0.1	47
TCGA-ZG-A9L4	1108	0	MALE	T3b	M0	N0	T1c	9	0.03	61
TCGA-ZG-A8QY	404	0	MALE	T3b	M0	N1	T2c	9	Unknown	67
TCGA-YL-A8SK	1408	0	MALE	T3b	M0	N1	Unknown	9	0.03	67
TCGA-ZG-A9ND	410	0	MALE	T3a	M0	N0	T1c	9	0.08	55
TCGA-KK-A6E1	2198	0	MALE	T3b	M0	N1	T2c	9	0.1	57
TCGA-EJ-5522	2079	0	MALE	T2c	M0	N0	T2a	7	0.1	51
TCGA-HC-8265	483	0	MALE	T3a	Unknown	N0	Unknown	8	0.1	66
TCGA-WW-A8ZI	449	0	MALE	T2c	M0	N0	T2c	8	0	70
TCGA-G9-6348	1515	0	MALE	T2c	M0	N0	T3a	7	0.02	68
TCGA-VP-A87C	1690	0	MALE	T2c	M0	N0	T1c	7	0.5	67
TCGA-EJ-5514	1829	0	MALE	T2c	M0	N0	T1c	9	0.1	66
TCGA-EJ-7786	1096	0	MALE	T2c	M0	N0	T1c	7	0.1	62
TCGA-XQ-A8TB	770	0	MALE	T3b	M0	N0	T2a	9	0	67
TCGA-CH-5766	31	0	MALE	T3a	M0	N1	Unknown	7	13.9	55
TCGA-X4-A8KQ	1383	0	MALE	T3b	M0	N0	T1c	9	0.25	65
TCGA-J9-A8CN	1237	0	MALE	T3a	M0	Unknown	T1c	6	0.03	53
TCGA-YL-A8SJ	752	1	MALE	T3b	M0	N0	Unknown	9	0.24	60
TCGA-HC-A8D0	775	0	MALE	T2a	M0	N0	T1c	7	0.01	61
TCGA-TK-A8OK	27	0	MALE	Unknown	M0	Unknown	Unknown	7	Unknown	73
TCGA-KK-A8II	626	1	MALE	T3a	M0	N0	T2c	9	39.8	61
TCGA-EJ-A7NG	432	0	MALE	T3a	M0	N0	T3a	7	0.1	64
TCGA-HC-8260	686	0	MALE	T2c	M0	N0	Unknown	7	0.01	43
TCGA-KK-A8I7	1088	1	MALE	T3b	M0	N0	T2c	9	0.1	55
TCGA-EJ-5510	1887	0	MALE	T2c	M0	N0	T1c	7	0.1	48
TCGA-KK-A7B2	692	1	MALE	T3a	M0	N1	T1c	9	0.3	68
TCGA-EJ-A46E	524	0	MALE	Unknown	M0	N0	T1c	8	0.1	57
TCGA-G9-7521	942	0	MALE	T3a	M0	N1	T3a	8	0.06	52
TCGA-V1-A9OQ	371	0	MALE	T3a	M0	Unknown	T1c	6	0.01	67
TCGA-G9-6364	1198	0	MALE	T3a	M0	N0	Unknown	7	0.03	72
TCGA-HC-A631	54	0	MALE	T2c	M0	N0	T2	9	Unknown	67
TCGA-G9-6366	1947	0	MALE	T3b	Unknown	Unknown	T1c	7	0.1	61
TCGA-HC-7078	1985	0	MALE	T3a	M0	N0	T1c	7	0.01	69
TCGA-VN-A88P	1260	0	MALE	T2c	M0	N0	T1c	7	0	60
TCGA-XK-AAJA	930	0	MALE	T3a	M0	N0	T2a	7	0.09	62
TCGA-ZG-A9M4	547	0	MALE	T3b	M0	N1	T2a	9	0.95	65
TCGA-HC-8264	48	0	MALE	T3b	Unknown	N1	Unknown	9	Unknown	60
TCGA-KK-A8IG	2505	0	MALE	T3a	M0	N0	T2a	7	0.1	55
TCGA-VP-A87B	2473	1	MALE	T2b	M0	N0	T1c	8	3.37	63
TCGA-V1-A8ML	448	0	MALE	T2c	M0	N0	T2b	7	0.01	63
TCGA-G9-6385	830	0	MALE	T2c	M0	Unknown	T1c	7	0.064	66
TCGA-G9-6347	2089	0	MALE	T2c	M0	Unknown	T1c	6	0.03	59
TCGA-J4-A67T	183	0	MALE	T2c	M0	Unknown	T1c	7	0.1	63
TCGA-ZG-A9L0	355	0	MALE	T3b	M0	N1	Unknown	9	Unknown	71
TCGA-G9-6499	1543	0	MALE	T3a	M0	N0	T3a	9	0.11	66
TCGA-V1-A9OL	105	1	MALE	T3b	M0	N0	T2	9	0.01	65
TCGA-EJ-7789	1105	0	MALE	T3a	M0	N0	T1c	7	Unknown	66
TCGA-ZG-A8QW	94	0	MALE	T3b	M0	N1	T3a	9	Unknown	72
TCGA-KK-A59X	2233	1	MALE	T3b	M0	N1	T3a	9	Unknown	55
TCGA-M7-A721	400	0	MALE	T2c	M0	Unknown	T1c	7	Unknown	70
TCGA-EJ-7115	2687	0	MALE	T3a	M0	N0	T1c	7	0.1	65
TCGA-EJ-A46F	215	1	MALE	T3b	M0	N1	T2c	8	19.8	57
TCGA-M7-A723	763	0	MALE	T3b	M0	N1	T1c	7	0.1	54
TCGA-XK-AAJ3	1262	0	MALE	T3a	M0	N0	T1c	8	0.09	56
TCGA-KK-A7AZ	1519	0	MALE	T3a	Unknown	N0	T2b	7	Unknown	56
TCGA-HC-7742	938	0	MALE	T3a	M0	N0	Unknown	7	0.1	58
TCGA-HC-7745	721	0	MALE	T3b	Unknown	N0	Unknown	7	Unknown	65
TCGA-V1-A8MM	990	1	MALE	T3a	M0	N0	T2b	7	0.37	60
TCGA-KC-A7FA	598	0	MALE	T3a	M0	N0	T2c	7	0	63
TCGA-VP-A875	2309	0	MALE	T3a	M0	N0	T2a	7	0.01	67
TCGA-HC-7081	1136	0	MALE	T3b	Unknown	Unknown	Unknown	9	Unknown	62
TCGA-CH-5745	91	0	MALE	T3a	M0	N0	Unknown	7	4.3	68
TCGA-HI-7168	2505	1	MALE	T3b	M0	N0	T1c	9	0.3	62
TCGA-HC-7738	420	1	MALE	T2c	M0	Unknown	Unknown	7	Unknown	58
TCGA-V1-A9OH	2403	0	MALE	T2b	M0	Unknown	T1c	8	0.01	63
TCGA-TP-A8TV	610	0	MALE	T2c	M0	N0	T1c	7	0.019	62
TCGA-J9-A52C	178	0	MALE	T3b	Unknown	Unknown	T1c	9	0.03	57
TCGA-YL-A9WL	740	1	MALE	T3a	M0	N0	T2a	9	6.4	59
TCGA-EJ-5521	2279	0	MALE	T3a	M0	N0	T1c	7	0.1	63
TCGA-EJ-5516	1889	0	MALE	T3a	M0	N0	T2b	7	0.12	49
TCGA-CH-5738	212	0	MALE	Unknown	M0	Unknown	Unknown	6	0.01	72
TCGA-G9-7519	849	0	MALE	T2c	M0	Unknown	T1c	7	0.03	58
TCGA-HC-7213	170	1	MALE	T3b	M0	N0	T3b	9	4.09	53
TCGA-G9-6384	765	0	MALE	T3a	M0	N0	T1c	7	0.03	53
TCGA-EJ-8474	766	0	MALE	T3a	M0	N0	T3a	8	0.01	69
TCGA-HC-A6AQ	106	0	MALE	T2c	M0	Unknown	T1c	7	Unknown	60
TCGA-EJ-7793	114	0	MALE	T2c	M0	Unknown	T2c	7	0.1	49
TCGA-HC-7752	782	0	MALE	T2c	M0	N0	Unknown	7	0.1	61
TCGA-XJ-A83F	1127	0	MALE	T3a	Unknown	N0	Unknown	7	0.01	67
TCGA-EJ-5508	1965	0	MALE	T3a	M0	N0	T1c	7	0.1	65
TCGA-KK-A7AQ	1217	1	MALE	T2c	M0	N0	T2a	7	0.1	62
TCGA-XK-AAIV	1133	0	MALE	T3b	M0	N1	T1c	10	0.32	63
TCGA-EJ-7315	1008	0	MALE	T3a	M0	N0	T2a	7	0.1	68
TCGA-J4-A83I	685	0	MALE	T3a	M0	N0	T1c	7	0.1	63
TCGA-EJ-7312	1099	0	MALE	T3b	M0	N0	T3b	7	0.1	58
TCGA-EJ-A7NH	474	0	MALE	T2c	M0	N0	T2c	7	0.1	56
TCGA-CH-5737	91	0	MALE	T2c	M0	N0	Unknown	7	14.69	73
TCGA-EJ-A65B	710	0	MALE	T3b	M0	N0	T3b	9	0.01	55
TCGA-CH-5764	31	0	MALE	T3b	M0	N0	Unknown	7	13.95	66
TCGA-VN-A88M	189	0	MALE	T2c	M0	N0	T1c	7	Unknown	55
TCGA-EJ-5503	1391	0	MALE	T3a	M0	N0	T2b	8	0.1	50
TCGA-J4-A67L	770	0	MALE	T3a	M0	N0	T2a	7	0.01	54
TCGA-EJ-5530	1832	0	MALE	T2c	M0	N0	T2c	7	0.1	61
TCGA-VP-A87K	533	1	MALE	T3b	M0	N0	T1c	8	0.3	63
TCGA-QU-A6IO	3716	0	MALE	T2c	M0	N0	T1c	6	0.1	53
TCGA-VP-A879	728	0	MALE	T2b	M0	N0	T1c	9	0.01	70
TCGA-VP-A878	98	1	MALE	T2c	Unknown	N1	T1c	9	0.1	58
TCGA-4L-AA1F	350	0	MALE	T3b	M1a	N0	T2c	8	3.5	64
TCGA-KC-A7F6	263	0	MALE	T2c	M0	N0	T1c	7	0	63
TCGA-KK-A8IK	2052	0	MALE	T2c	M0	N0	T1c	9	0	56
TCGA-EJ-A65E	417	0	MALE	T3b	M0	N0	T3b	7	0.1	67
TCGA-EJ-7792	1396	0	MALE	T2c	M0	N0	T1c	7	0.13	53
TCGA-KK-A8I8	967	0	MALE	T3b	M0	N0	T2a	9	0.1	69
TCGA-V1-A8WL	1948	0	MALE	T3a	M0	N0	T1c	7	0.015	64
TCGA-YL-A8HJ	1611	0	MALE	T3b	M0	Unknown	Unknown	9	0.03	58
TCGA-KK-A59Z	2628	0	MALE	T2c	M0	N0	T2b	7	0.1	66
TCGA-HC-7749	724	0	MALE	T3a	M0	N0	Unknown	7	0.1	70
TCGA-HC-A6AP	71	0	MALE	T2c	M0	Unknown	T1c	7	Unknown	61
TCGA-QU-A6IM	1247	0	MALE	T2a	M0	N0	T2b	7	0.1	59
TCGA-EJ-7314	1150	0	MALE	T3b	M0	N0	T2c	7	0.1	62
TCGA-J4-AATV	553	0	MALE	T2c	M0	N0	Unknown	6	0	71
TCGA-H9-7775	185	0	MALE	T2c	Unknown	Unknown	Unknown	7	0.04	68
TCGA-EJ-A65J	451	0	MALE	T3a	M0	N0	T3a	9	0.1	62
TCGA-KK-A7AP	196	0	MALE	T3b	M0	N1	T2b	9	Unknown	55
TCGA-YL-A8HL	1565	0	MALE	T3b	M0	N1	Unknown	9	0.03	58
TCGA-EJ-5518	2104	1	MALE	T4	M0	N0	T3b	9	0.1	66
TCGA-HC-A632	61	0	MALE	T3a	M0	N0	T1c	9	Unknown	68
TCGA-ZG-A9LZ	692	0	MALE	T3b	M0	N0	T3a	9	2.19	66
TCGA-EJ-5499	1415	0	MALE	T3a	M0	N0	T2b	7	0.1	61
TCGA-ZG-A9L1	1302	0	MALE	T3b	M0	N1	T1c	9	0.07	66
TCGA-CH-5769	62	0	MALE	T3b	M0	N0	Unknown	9	11.16	48
TCGA-G9-6378	1155	0	MALE	T2c	M0	Unknown	T1c	7	0.03	54
TCGA-FC-7708	864	0	MALE	T3a	M0	N0	T1c	7	Unknown	52
TCGA-KK-A6E3	2056	0	MALE	T2c	M0	N0	T1c	7	0.1	56
TCGA-M7-A720	384	0	MALE	T2c	Unknown	Unknown	T1c	6	Unknown	53
TCGA-KK-A8I5	3096	0	MALE	T2b	M0	N0	T2a	7	0.1	55
TCGA-HI-7171	1329	1	MALE	T3b	M0	N0	T3a	9	0.7	56
TCGA-G9-6342	1696	0	MALE	T3a	M0	Unknown	T2c	6	0.05	61
TCGA-V1-A8WV	686	0	MALE	T3b	M0	N1	T2a	9	0.01	52
TCGA-YL-A9WY	765	1	MALE	T3b	M0	N1	T3a	9	1.8	57
TCGA-EJ-5507	1457	0	MALE	T3b	M0	N1	T2c	9	0.1	54
TCGA-M7-A725	573	0	MALE	T3b	M0	N0	T3a	7	Unknown	56
TCGA-HC-7230	1001	0	MALE	T2c	Unknown	N0	Unknown	7	3	50
TCGA-J4-A67R	910	0	MALE	T2c	M0	N0	T1c	7	0.1	65
TCGA-J9-A8CP	386	0	MALE	T3a	M0	Unknown	T2a	7	0.01	66
TCGA-KK-A8IB	83	0	MALE	T3a	M0	N0	T2a	9	Unknown	65
TCGA-CH-5767	458	0	MALE	T2c	M0	N0	Unknown	7	0.04	66
TCGA-EJ-5512	1733	0	MALE	T2c	M0	N0	T1c	7	0	46
TCGA-KK-A6E8	1770	0	MALE	T2c	M0	N0	T1c	9	0.1	68
TCGA-M7-A71Z	643	0	MALE	T3a	Unknown	N0	T2a	7	Unknown	62
TCGA-ZG-A9L9	51	1	MALE	T3b	M0	N1	T2b	9	Unknown	60
TCGA-G9-A9S0	423	1	MALE	T3b	M0	N1	T2a	8	10.87	53
TCGA-ZG-A9KY	130	0	MALE	T4	M0	N1	T1c	9	Unknown	73
TCGA-V1-A9ZG	1517	0	MALE	T2c	M0	N0	T1c	9	0.015	64
TCGA-2A-A8VT	1373	0	MALE	T4	M0	N1	T2c	9	0.05	47
TCGA-G9-6496	1726	0	MALE	T2c	M0	N0	T1c	7	0.03	61
TCGA-ZG-A8QX	442	0	MALE	T2c	M0	N0	T1c	6	Unknown	56
TCGA-EJ-5504	1427	0	MALE	T3a	M0	N1	T2c	7	1	65
TCGA-EJ-7123	2572	0	MALE	T2c	M0	N0	T1c	7	0.1	59
TCGA-EJ-A8FO	282	0	MALE	T3a	M0	N0	T3a	7	0.1	51
TCGA-HC-7744	531	0	MALE	T3b	M0	N0	Unknown	7	0.04	46
TCGA-M7-A71Y	493	0	MALE	T2c	Unknown	Unknown	T1c	7	Unknown	55
TCGA-EJ-A6RA	353	1	MALE	T3b	M0	N1	T3b	8	0.652	70
TCGA-EJ-5496	595	0	MALE	T2c	M0	N0	T1c	7	0.1	59
TCGA-CH-5752	943	0	MALE	T3a	M0	N0	Unknown	8	0.02	66
TCGA-CH-5741	395	0	MALE	T3b	M0	N1	Unknown	9	0.02	56
TCGA-EJ-5498	1720	0	MALE	T2c	Unknown	N0	T2c	7	0.1	56
TCGA-ZG-A9LY	370	0	MALE	T3b	M0	N1	T2b	9	0.01	60
TCGA-YL-A9WK	1009	1	MALE	T3b	M0	N0	T2b	9	15.6	63
TCGA-KK-A8ID	2107	0	MALE	T3b	M0	N1	T2b	9	0.1	70
TCGA-G9-6369	1215	0	MALE	T2c	M0	N0	T1c	7	0.03	55
TCGA-HC-7820	747	0	MALE	T2c	Unknown	Unknown	Unknown	7	Unknown	72
TCGA-G9-6498	1342	1	MALE	T3a	M0	Unknown	T1c	7	0.03	53
TCGA-HC-7075	601	0	MALE	T2a	M0	Unknown	T1c	6	0.01	63
TCGA-V1-A8WW	1078	0	MALE	T3b	M0	N1	T2b	9	0.015	59
TCGA-ZG-A9L6	664	1	MALE	T3b	M0	N0	T1c	9	0.36	64
TCGA-HC-8213	589	0	MALE	T2c	Unknown	Unknown	Unknown	6	Unknown	48
TCGA-HC-7231	939	0	MALE	T2c	M0	Unknown	T1c	7	Unknown	66
TCGA-YL-A9WH	427	0	MALE	T3b	M0	N1	Unknown	9	0.03	67
TCGA-XK-AAJR	131	1	MALE	T3a	M0	N0	T1c	7	0.09	61
TCGA-EJ-5524	265	1	MALE	T3a	M0	N0	T2b	9	0.1	57
TCGA-EJ-5532	1828	0	MALE	T3a	M0	N0	T1c	7	0.1	57
TCGA-CH-5791	396	1	MALE	T3a	M0	N0	Unknown	7	0.18	72
TCGA-V1-A9OT	292	1	MALE	T2c	M0	Unknown	T1c	6	0.01	61
TCGA-CH-5740	31	0	MALE	T2c	M0	N0	Unknown	7	1.6	57
TCGA-G9-7523	857	0	MALE	T3a	M0	N0	T1c	10	0.03	44
TCGA-CH-5771	396	0	MALE	T2c	M0	N0	Unknown	7	0.03	63
TCGA-EJ-5505	922	0	MALE	T2c	M0	N0	T1c	7	0.1	57
TCGA-HC-7233	1355	0	MALE	T2a	Unknown	N0	Unknown	7	Unknown	73
TCGA-CH-5750	396	0	MALE	T2c	M0	N0	Unknown	7	0.02	72
TCGA-HC-7818	938	0	MALE	T2c	M0	N0	T2b	7	0.01	66
TCGA-EJ-8472	196	1	MALE	T3a	M0	N0	T3a	8	0.4	63
TCGA-HC-7232	766	1	MALE	T3b	Unknown	Unknown	Unknown	9	Unknown	66
TCGA-V1-A8MU	1876	0	MALE	T3a	M0	N1	T2b	7	0.015	56
TCGA-XJ-A83G	1461	0	MALE	T3b	Unknown	N0	T1c	7	0.01	51
TCGA-KC-A7F3	665	0	MALE	T2c	M0	N0	T1c	7	0	67
TCGA-YL-A8SI	1423	1	MALE	T3a	M0	N0	Unknown	9	0.48	69
TCGA-YL-A8SC	152	1	MALE	T3a	M0	N0	Unknown	9	0.65	66
TCGA-G9-6365	1363	0	MALE	T4	Unknown	N0	T2a	7	0.01	71
TCGA-H9-A6BY	112	0	MALE	T3a	Unknown	N0	T1c	7	Unknown	63
TCGA-J4-A67S	708	1	MALE	T3a	M0	N0	T2b	7	0.1	63
TCGA-J9-A8CM	344	1	MALE	T3b	M0	N1	T2c	9	0.55	66
TCGA-G9-6332	1180	1	MALE	T3a	M0	N0	T2b	7	0.73	55
TCGA-HC-7079	380	1	MALE	T3a	M0	N0	T3a	7	0.1	51
TCGA-EJ-5531	1273	0	MALE	T3a	M0	N0	T2b	7	0.1	62
TCGA-EJ-7785	1177	0	MALE	T3a	M0	N0	T2b	7	0.1	54
TCGA-EJ-A46G	668	0	MALE	T3a	M0	N0	T3a	8	0.1	71
TCGA-G9-6363	1378	0	MALE	T4	M0	N0	T2b	7	0.03	64
TCGA-H9-A6BX	941	0	MALE	T2c	Unknown	Unknown	Unknown	6	0.04	60
TCGA-V1-A8WN	924	0	MALE	T2c	M0	Unknown	T2a	6	0.02	47
TCGA-KK-A8IL	628	0	MALE	T3b	M0	N1	T1c	9	0.1	65
TCGA-EJ-A65F	75	1	MALE	T3b	M0	N0	T3b	9	0.8	59
TCGA-G9-6338	2028	0	MALE	T3a	M0	N0	T1c	7	0.05	61
TCGA-EJ-A8FP	117	1	MALE	T2c	M0	N0	T2c	8	0.2	59
TCGA-V1-A8MK	508	0	MALE	T2c	M0	N0	T2a	6	0.83	41
TCGA-EJ-7331	742	0	MALE	T2c	M0	N0	T1c	7	0.8	64
TCGA-G9-6377	958	0	MALE	T2c	M0	N0	T2b	7	0.03	61
TCGA-EJ-5525	546	1	MALE	T2c	M0	N0	T3a	9	3	67
TCGA-CH-5751	365	1	MALE	T4	M0	N1	Unknown	10	0.01	68
TCGA-CH-5753	31	0	MALE	T3b	M0	N1	Unknown	9	4.53	70
TCGA-EJ-A8FS	216	1	MALE	T3a	M0	N0	T3a	7	0.3	66
TCGA-HC-7080	894	1	MALE	T2a	M0	N0	T2a	7	0.1	66
TCGA-J9-A52E	323	0	MALE	T3b	Unknown	N0	T2c	9	0.01	65
TCGA-HC-A9TE	216	1	MALE	T3b	M0	N0	T2c	9	0.064	64
TCGA-X4-A8KS	979	0	MALE	T2c	M0	Unknown	T2c	7	0.01	61
TCGA-CH-5788	821	0	MALE	T3b	M0	N1	Unknown	7	3.58	69
TCGA-G9-7510	1185	0	MALE	T3a	M0	N0	T1c	8	0.03	66
TCGA-TP-A8TT	526	0	MALE	T3a	M0	N0	T1c	7	0.024	64
TCGA-HC-8256	860	0	MALE	T2c	M0	Unknown	Unknown	7	Unknown	53
TCGA-VP-A876	3333	0	MALE	T2c	Unknown	N0	T1c	8	0.1	46
TCGA-YL-A8S8	679	1	MALE	T3a	M0	N0	Unknown	9	1.36	68
TCGA-VP-A87H	663	0	MALE	T3b	M0	N0	T2	9	0.01	76
TCGA-2A-A8VL	621	0	MALE	T2b	M0	N0	Unknown	6	0.05	51
TCGA-KK-A8I6	668	0	MALE	T3a	M0	N0	T2b	7	0.2	58
TCGA-M7-A722	559	1	MALE	T3a	M0	N0	T2a	8	Unknown	65
TCGA-2A-A8VV	671	0	MALE	T2b	M0	N0	T2b	6	0.05	52
TCGA-G9-6371	1226	0	MALE	T2c	M0	Unknown	T1c	6	0.03	58
TCGA-J4-A67K	1004	0	MALE	T2c	M0	Unknown	T2b	7	0.1	68
TCGA-EJ-7125	2850	0	MALE	T2c	M0	N0	T1c	7	0.1	44
TCGA-V1-A9OY	1067	0	MALE	T3a	M0	N1	T2	7	0.099	57
TCGA-ZG-A9LN	115	0	MALE	T3b	M0	N1	T1c	9	7.42	57
TCGA-KK-A6E6	3447	0	MALE	T3a	M0	N0	T2b	9	0.1	69
TCGA-CH-5748	31	0	MALE	T3a	Unknown	N0	Unknown	7	Unknown	64
TCGA-CH-5743	425	1	MALE	T2c	M0	N0	Unknown	7	0.1	66
TCGA-KK-A8IC	1060	1	MALE	T3b	M0	N0	T1c	9	0.9	54
TCGA-EJ-A8FU	138	0	MALE	T3a	M0	N0	T3a	8	Unknown	64
TCGA-V1-A9ZR	1361	0	MALE	T4	M0	N0	T2c	8	1.44	68
TCGA-J9-A52D	212	0	MALE	T3a	M0	Unknown	T2b	9	0.059	71
TCGA-XJ-A83H	1280	0	MALE	T2c	M0	Unknown	T2a	7	0.03	57
TCGA-EJ-7330	191	0	MALE	T3a	M0	N0	T1c	7	0.1	68
TCGA-J4-A83K	328	0	MALE	T2c	M0	Unknown	T1c	6	0.1	52
TCGA-EJ-7783	787	0	MALE	T3a	M0	N0	T2c	7	0.7	70
TCGA-EJ-7317	771	0	MALE	T2c	M0	N0	T1c	7	0.1	71
TCGA-V1-A9Z9	540	0	MALE	T2c	M0	N0	T1c	9	0.015	63
TCGA-HC-7211	1221	0	MALE	T2c	M0	N0	T2a	7	10.9	62
TCGA-V1-A9O7	819	1	MALE	T3a	M0	N0	T2b	9	9.69	60
TCGA-YL-A8SQ	329	1	MALE	T3b	M0	N0	Unknown	9	1.1	61
TCGA-KK-A59V	3440	0	MALE	T3b	M0	N0	T3a	9	0.1	64
TCGA-V1-A9OF	1184	0	MALE	T2c	M0	Unknown	T1c	6	0.01	49
TCGA-KK-A7B3	294	1	MALE	T3b	M0	N0	T3a	9	0.1	62
TCGA-EJ-5527	1778	0	MALE	T3a	M0	N0	T2a	7	0.1	69
TCGA-ZG-A9LM	378	0	MALE	T3a	M0	N1	T2b	9	0	72
TCGA-HC-7747	748	0	MALE	T2c	M0	N0	T2b	7	0.19	52
TCGA-XJ-A9DI	1461	0	MALE	T3b	M0	N0	T2b	9	0.1	62
TCGA-J4-A67O	839	0	MALE	T2c	M0	N0	T2a	7	0.1	59
TCGA-KC-A7F5	91	0	MALE	T2c	M0	N0	T2c	7	0	54
TCGA-J4-A6M7	512	0	MALE	T2c	M0	Unknown	T2	7	0.1	53
TCGA-G9-6339	1634	1	MALE	T3b	M0	N0	T3b	7	0.03	58
TCGA-XK-AAJU	1576	0	MALE	T2c	M0	N0	T1c	7	0.09	65
TCGA-EJ-5515	1832	0	MALE	T3a	M0	N0	T1c	7	0.1	60
TCGA-J4-A6G3	618	1	MALE	T3b	M0	N0	T2	8	0.4	57
TCGA-SU-A7E7	551	0	MALE	T2b	M0	N0	T2b	8	0.01	60
TCGA-CH-5746	731	0	MALE	T2c	M0	N0	Unknown	7	0.1	57
TCGA-HC-7209	440	0	MALE	T2c	Unknown	N0	T2b	6	0.05	60
TCGA-J4-A83J	696	0	MALE	T2c	M0	N0	T1c	7	0.04	68
TCGA-KK-A8IA	1931	0	MALE	T3b	M0	N1	T3b	9	0.1	69
TCGA-EJ-7797	983	0	MALE	T2c	M0	N0	T1c	7	0.1	53
TCGA-KK-A7AW	1054	0	MALE	T3a	M0	N1	T2a	7	0.8	57
TCGA-2A-A8W3	198	1	MALE	T3a	M0	N0	T2b	9	0.36	69
TCGA-EJ-7788	859	0	MALE	T3b	M0	N0	T3b	7	0.2	53
TCGA-G9-7525	994	0	MALE	T2c	M0	N0	T1c	7	0.03	64
TCGA-YJ-A8SW	148	0	MALE	T3b	Unknown	N0	T1c	9	0.38	67
TCGA-KK-A6DY	4295	0	MALE	T2c	M0	N0	T1c	7	0.1	50
TCGA-HC-8257	726	0	MALE	T3b	Unknown	N1	Unknown	7	0.1	70
TCGA-EJ-7321	824	0	MALE	T3a	M0	N0	T1c	6	0.1	57
TCGA-KK-A8IH	2013	0	MALE	T3a	M0	N0	T2b	7	0.1	50
TCGA-HI-7169	2684	0	MALE	T3a	M0	N0	T2b	7	0.1	55
TCGA-YL-A8HM	1473	1	MALE	T3b	M0	N0	Unknown	9	0.03	66
TCGA-EJ-7318	380	1	MALE	T3a	M0	Unknown	T3a	7	0.08	51
TCGA-MG-AAMC	173	0	MALE	T3a	M0	N0	T1c	9	0.01	59
TCGA-YL-A8SL	987	0	MALE	T3b	M0	N1	Unknown	8	0	74
TCGA-G9-6361	1415	0	MALE	T3a	M0	N0	T2c	7	0.1	61
TCGA-KK-A8IM	1915	0	MALE	T2c	M0	N0	T2a	7	0.1	55
TCGA-EJ-A8FN	329	0	MALE	T2c	M0	N0	T2c	7	0.1	58
TCGA-YL-A8SP	2036	1	MALE	T3b	M0	Unknown	T2a	9	0.38	58
TCGA-KC-A4BV	1328	1	MALE	T3a	M0	N0	T2	9	0.53	66
TCGA-V1-A8MF	1449	0	MALE	T3a	M0	N0	T2c	6	0.14	65
TCGA-XJ-A9DQ	91	0	MALE	T2a	M0	Unknown	T1c	6	Unknown	48
TCGA-EJ-7327	923	0	MALE	T3b	M0	N0	T2a	7	0.1	61
TCGA-KC-A7FD	270	0	MALE	T3a	M0	N0	T1c	7	0	62
TCGA-HC-7077	2115	0	MALE	T3a	M0	Unknown	T1c	6	0.83	64
TCGA-G9-6354	2066	0	MALE	T2b	M0	Unknown	T1c	7	0.03	55
TCGA-V1-A8WS	474	0	MALE	T3b	M0	Unknown	T1c	6	0.09	56
TCGA-J4-A67Q	975	0	MALE	T2c	M0	Unknown	T2b	6	0.1	77
TCGA-VN-A88Q	1366	0	MALE	T2c	M0	N0	T2a	8	0	60
TCGA-CH-5794	882	0	MALE	T2b	M0	N0	Unknown	7	0.01	65
TCGA-J4-A83L	720	0	MALE	T2c	M0	N0	T1c	7	0.1	61
TCGA-G9-6351	2048	0	MALE	T2c	M0	Unknown	T1c	7	0.03	51
TCGA-J9-A8CK	321	0	MALE	T3a	M0	Unknown	T3a	9	0.01	66
TCGA-EJ-7791	1118	0	MALE	T2c	M0	N0	T1c	7	0.1	67
TCGA-EJ-7328	842	0	MALE	T3a	M0	N0	T1c	7	Unknown	70
TCGA-HC-A6HX	38	0	MALE	T2c	M0	N0	T1c	7	Unknown	55
TCGA-YL-A8SO	3479	0	MALE	T3a	M0	Unknown	T1a	9	0	64
TCGA-KC-A4BL	193	1	MALE	T2c	M0	N0	T1c	7	3.15	65
TCGA-EJ-5497	405	0	MALE	T2c	M0	N0	T2c	7	0.1	47
TCGA-YL-A8SH	875	0	MALE	T3a	M0	N0	Unknown	7	0.06	69
TCGA-HC-A76X	150	0	MALE	T2c	M0	N0	T1c	7	0.01	62
TCGA-G9-6362	1443	0	MALE	T3a	M0	N0	T1c	7	0.07	57
TCGA-CH-5772	486	0	MALE	T3a	M0	N0	Unknown	9	0.03	63
TCGA-FC-A5OB	680	0	MALE	T3b	M0	N0	T3a	9	5.22	53
TCGA-QU-A6IP	2620	0	MALE	T2a	M0	N0	T2a	6	0	66
TCGA-VN-A88R	512	1	MALE	T2c	M0	N0	T1c	8	0.15	53
TCGA-J4-A6G1	769	0	MALE	T3a	M0	N0	T2b	8	0.1	68
TCGA-QU-A6IN	4264	0	MALE	T2c	M0	N0	T1c	7	0.1	61
TCGA-EJ-7325	1070	0	MALE	T3b	M0	N0	T3b	7	0.1	63
TCGA-VN-A88L	746	0	MALE	T2c	M0	N0	T1c	7	0	54
TCGA-EJ-5501	1365	0	MALE	T3b	M0	N0	T2b	7	0.1	55
TCGA-CH-5768	731	0	MALE	T3a	M0	N0	Unknown	6	0.1	72
TCGA-EJ-5494	1477	0	MALE	T3a	M0	N0	T2a	7	Unknown	50
TCGA-HC-7737	1090	0	MALE	T2c	M0	N1	T1c	7	0.1	55
TCGA-KK-A8IJ	307	1	MALE	T3b	M0	N1	T3a	7	0.1	59
TCGA-XJ-A9DX	973	0	MALE	T3b	M1c	N1	T1c	9	0.05	51
TCGA-HC-A9TH	351	1	MALE	T3b	M0	N0	T1b	9	0.38	58
TCGA-CH-5765	700	0	MALE	T3a	M0	N0	Unknown	7	0.02	55
TCGA-KK-A6E5	2073	0	MALE	T3b	M0	N0	T1c	7	0.1	63
TCGA-EJ-5502	1171	0	MALE	T2c	M0	N0	T2c	7	0.1	50
TCGA-V1-A9Z8	827	0	MALE	T3b	M0	N0	Unknown	9	0.01	59
TCGA-KK-A7AV	822	0	MALE	T2c	M0	N0	T1c	7	0.1	58
TCGA-EJ-A65M	230	0	MALE	T2c	M0	N0	T2c	6	0.1	65
TCGA-FC-A8O0	616	0	MALE	T3a	M0	N0	T2c	6	7.82	68
TCGA-YL-A8HO	1068	1	MALE	T3a	M0	N0	Unknown	7	0.01	67
TCGA-ZG-A9N3	349	0	MALE	T3b	M0	N1	T1c	9	0.1	73
TCGA-ZG-A9MC	455	0	MALE	T3b	M0	N1	T2a	9	31.85	69
TCGA-CH-5792	91	0	MALE	T3a	M0	N0	Unknown	9	11.49	57
TCGA-J9-A52B	57	1	MALE	T3b	Unknown	N0	T3b	9	0.01	62
TCGA-EJ-5519	1962	0	MALE	T3b	M0	N1	T2c	8	0.2	64
TCGA-XJ-A9DK	275	0	MALE	T2c	M0	Unknown	T1c	8	0.1	63
TCGA-V1-A9Z7	874	0	MALE	T3b	M0	N0	T2	9	28.1	54
TCGA-HC-7750	522	0	MALE	T2c	M0	Unknown	T2b	7	0.1	50
TCGA-HI-7170	2522	0	MALE	T2c	M0	N0	T1c	6	0.1	58
TCGA-G9-6494	1771	0	MALE	T4	M0	N0	T1c	7	1.13	66
TCGA-HC-A6AS	44	0	MALE	T2a	M0	N0	T1c	7	Unknown	70
TCGA-EJ-5542	1513	0	MALE	T3a	M0	N0	T2b	7	0.1	60
TCGA-EJ-5526	537	1	MALE	T3a	M0	N1	T1c	8	0.1	56
TCGA-XQ-A8TA	146	1	MALE	Unknown	M1b	Unknown	T3a	10	323	59
TCGA-VP-A87D	1194	1	MALE	T3a	M0	N1	T1c	9	0.2	54
TCGA-M7-A724	889	0	MALE	T3a	M0	N0	T1c	8	Unknown	64
TCGA-HC-7212	870	0	MALE	T2a	M0	N0	Unknown	7	0.28	56
TCGA-J4-A83N	433	1	MALE	T2c	M0	Unknown	T1c	7	0.1	57
TCGA-CH-5790	974	0	MALE	T2c	M0	N0	Unknown	7	0.1	64
TCGA-EJ-AB27	145	0	MALE	T2c	M0	N0	T1c	6	0.1	51
TCGA-XA-A8JR	376	0	MALE	T2c	M0	N0	Unknown	7	0	68
TCGA-EJ-5509	1464	0	MALE	T2c	M0	N0	T2a	7	0.1	63
TCGA-VN-A943	496	0	MALE	T2c	M0	N0	T1c	8	0.01	71
TCGA-ZG-A9LU	579	0	MALE	T3a	M0	N0	T2b	9	0.7	67
