# Supplementary material for: Tumor-associated macrophages and PD-L1 in prostate cancer: a possible key to unlocking immunotherapy efficacy
Source: Aging (Albany NY). 2024 Jan 4;16(1):445–65. doi: 10.18632/aging.205378 (PMC10817380; doi:10.18632/aging.205378)
Supplement: Supplementary Table 2 [file aging-16-205378-s003.xlsx]

## Sheet: Drame
Supplementary Table 2. Clinical Characteristics of prad_su2c_2019 cohort.
ID	PATIENT_ID	POLYA_ARV7_SRPM	CAPTURE_ARV7_SRPM	OTHER_SAMPLE_ID	TISSUE_SOURCE_SITE	NEUROENDOCRINE_FEATURES	ABI_ENZA_EXPOSURE_STATUS	UNIQUE_PAPER_SAMPLES	ETS_FUSION_SEQ	ETS_FUSION_DETAILS	RAF1_BRAF_STATUS	AR_POLYA_SCORE	AR_CAPTURE_SCORE	AR_SCORE	NEPC_POLYA_SCORE	NEPC_CAPTURE_SCORE	NEPC_SCORE	TISSUE_SITE	AGE_AT_PROCUREMENT	GLEASON_SCORE	PATHOLOGY_CLASSIFICATION	TAXANE_EXPOSURE_STATUS	OFF_ARSI	SOMATIC_STATUS	ONCOTREE_CODE	CANCER_TYPE	CANCER_TYPE_DETAILED	TMB_NONSYNONYMOUS
TP_2077_Tumor	5115409	0.720078	0.628797		Michigan	No	Naive	YES	Positive	TMPRSS2-ERG		0.622175	0.632124	0.622175	-0.0121417	0.0243121	-0.0121417	LN	66.2	UNK	Adenocarcinoma	Naive	NA	Matched	PRAD	Prostate Cancer	Prostate Adenocarcinoma	2.56667
TP_2078_Tumor	5115410	6.89724	6.50529		Michigan	No	Naive	YES	Negative			0.595321	0.609205	0.595321	-0.14728	-0.0935583	-0.14728	LN	85	UNK	Adenocarcinoma	Naive	NA	Matched	PRAD	Prostate Cancer	Prostate Adenocarcinoma	4.06667
SC_9056_T	9115108	0.0171069	0.0987526			NA	Exposed	YES	Positive	TMPRSS2-ERG		0.590077	0.600456	0.590077	-0.00278626	0.0527868	-0.00278626	Bone	60	7	Not available	Naive	NA	Matched	PRAD	Prostate Cancer	Prostate Adenocarcinoma	2.56667
SC_9137_Tumor	9115422	1.0714	1.3146	9115422	Washington	No	Naive	YES	Positive	TMPRSS2-ERG		0.461181	0.479839	0.461181	-0.0779234	-0.0311976	-0.0779234	Bone	70	7	Adenocarcinoma	Naive	1	Matched	PRAD	Prostate Cancer	Prostate Adenocarcinoma	6.46667
SC_9139_Tumor	97115374	1.00057	0.713132	97115374-T-C-1	RoyalMarsden	No	UNK	YES	Positive	ACPP-ETV1		0.429001	0.417648	0.429001	0.078729	0.122916	0.078729	Other Soft tissue	NA	UNK	Adenocarcinoma	UNK	NA	Matched	PRAD	Prostate Cancer	Prostate Adenocarcinoma	3.13333
SC_9140_Tumor	97115375	2.31582	2.02264	97115375-T-C-1	RoyalMarsden	No	UNK	YES	Negative			0.377743	0.454374	0.377743	-0.101092	-0.0266121	-0.101092	Liver	NA	UNK	Adenocarcinoma	UNK	NA	Matched	PRAD	Prostate Cancer	Prostate Adenocarcinoma	8.4
SC_9142_Tumor	13115379	0	0	13115379-T-A-1	Karmanos	NA	Naive	YES	Negative			0.0042188	0.048908	0.0042188	0.144374	0.216112	0.144374	LN	48	9	Inadequate for diagnosis	Naive	NA	Matched	PRAD	Prostate Cancer	Prostate Adenocarcinoma	4.96667
MO_1469_T	5115547	0	0		Michigan	Yes	Naive	YES	Negative			-0.0105641	-0.0713395	-0.0105641	0.699597	0.668608	0.699597	Other Soft tissue	65	UNK	Adenocarcinoma with NE features	Naive	NA	Matched	PRAD	Prostate Cancer	Prostate Adenocarcinoma	1.6
TP_2081_T	5115412	0.68136	1.41043		Michigan	No	Naive	YES	Negative			0.489384	0.559341	0.489384	-0.0838067	-0.0388266	-0.0838067	Bone	59.4	8	Adenocarcinoma	Naive	NA	Matched	PRAD	Prostate Cancer	Prostate Adenocarcinoma	2.5
SC_9074_T	9115184	13.919	9.21874		Washington	NA	Exposed	YES	Positive	TMPRSS2-ERG		0.610081	0.608437	0.610081	-0.0785729	-0.028969	-0.0785729	LN	64.1	9	Inadequate for diagnosis	Naive	NA	Matched	PRAD	Prostate Cancer	Prostate Adenocarcinoma	3.96667
SC_9086_T	9115341	0.0432308	0.0985872			NA	Exposed	YES	Positive	TMPRSS2-ERG		0.384561	0.410265	0.384561	-0.0953564	-0.0341823	-0.0953564	Bone	72	9	Not available	Naive	NA	Matched	PRAD	Prostate Cancer	Prostate Adenocarcinoma	0.333333
SC_9145_Tumor	9115516	0.197068	0.151788	9115516	Washington	No	Exposed	YES	Negative			0.427919	0.504713	0.427919	-0.0240077	-0.0291481	-0.0240077	Liver	75	6	Adenocarcinoma	Exposed	NA	Matched	PRAD	Prostate Cancer	Prostate Adenocarcinoma	5.43333
SC_9148_Tumor	9115515	6.44441	5.12916	9115515	Washington	No	Exposed	YES	Positive			0.361019	0.372621	0.361019	-0.129123	-0.0713673	-0.129123	LN	83	9	Adenocarcinoma	Naive	NA	Matched	PRAD	Prostate Cancer	Prostate Adenocarcinoma	2.7
SC_9153_Tumor	9115519	9.2832	6.32331	9115519	Washington	No	Exposed	YES	Positive	TMPRSS2-ERG		0.496139	0.481195	0.496139	-0.0493234	-0.0134056	-0.0493234	Liver	72	7	Adenocarcinoma	Exposed	NA	Matched	PRAD	Prostate Cancer	Prostate Adenocarcinoma	1.83333
TP_2093_T	5115528	3.40728	3.65579		Michigan	No	Naive	YES	Positive	TMPRSS2-ERG		0.603596	0.595607	0.603596	0.0154798	0.0553849	0.0154798	LN	64	9	Adenocarcinoma	Naive	NA	Matched	PRAD	Prostate Cancer	Prostate Adenocarcinoma	0.2
TP_2096_T	5115506	2.65095	3.1427	5115506	Michigan	No	Naive	YES	Positive	TMPRSS2-ERG		0.605166	0.63113	0.605166	-0.0703612	-0.0102538	-0.0703612	LN	53.4	UNK	Adenocarcinoma	Exposed	NA	Matched	PRAD	Prostate Cancer	Prostate Adenocarcinoma	2.83333
SC_9156_Tumor	97115447	5.54834	3.77039	97115447-T-C-1	RoyalMarsden	No	Exposed	YES	Negative			0.588942	0.566216	0.588942	-0.0846476	-0.0389539	-0.0846476	Other Soft tissue	59.7	9	Adenocarcinoma	Exposed	NA	Matched	PRAD	Prostate Cancer	Prostate Adenocarcinoma	2.83333
SC_9162_Tumor	97115453	3.65162	3.1623	97115453-T-A-1	RoyalMarsden	NA	Exposed	YES	Positive	TMPRSS2-ERG		0.473256	0.44957	0.473256	0.0284985	0.0764692	0.0284985	Liver	75.7	10	Not available	Naive	NA	Matched	PRAD	Prostate Cancer	Prostate Adenocarcinoma	2.26667
SC_9163_Tumor	97115454	4.39606	4.21892	97115454-T-A-1	RoyalMarsden	No	Exposed	YES	Positive	TMPRSS2-ERG		0.566639	0.58009	0.566639	-0.0594072	-0.00433604	-0.0594072	LN	69.8	9	Adenocarcinoma	Exposed	NA	Matched	PRAD	Prostate Cancer	Prostate Adenocarcinoma	36.7
SC_9165_Tumor	97115456	0	0	97115456-T-A-1	RoyalMarsden	No	Exposed	YES	Negative			-0.111873	-0.142622	-0.111873	0.58738	0.575969	0.58738	LN	66.8	9	Adenocarcinoma	Exposed	NA	Matched	PRAD	Prostate Cancer	Prostate Adenocarcinoma	5.1
SC_9027_T	9115059	0.199583	0.341228			NA	Exposed	YES	Positive	YWHAE-ETV1		0.445731	0.450434	0.445731	-0.147209	-0.122782	-0.147209	Bone	69	6	Not available	Naive	NA	Matched	PRAD	Prostate Cancer	Prostate Adenocarcinoma	4.13333
SC_9175_T	9115524	0.336829	0.35979	9115524	Washington	No	Naive	YES	Positive	TMPRSS2-ERG		0.527462	0.580592	0.527462	-0.146204	-0.0944849	-0.146204	LN	58	9	Adenocarcinoma	Naive	1	Matched	PRAD	Prostate Cancer	Prostate Adenocarcinoma	1.2
MO_1492_T	5115608	5.46465	5.60716		Michigan	No	Exposed	YES	Negative			0.53431	0.518261	0.53431	-0.0790068	-0.0240078	-0.0790068	Other Soft tissue	58.2	UNK	Adenocarcinoma	Exposed	NA	Matched	PRAD	Prostate Cancer	Prostate Adenocarcinoma	1.93333
MO_1510_T	5115610	0.123115	0.0747443		Michigan	No	Naive	YES	Positive	TMPRSS2-ERG		0.468635	0.472677	0.468635	-0.0301923	-0.00074229	-0.0301923	LN	63.3	UNK	Adenocarcinoma	Naive	1	Matched	PRAD	Prostate Cancer	Prostate Adenocarcinoma	0
MO_1511_T	5115611	11.3558	11.3169		Michigan	No	Naive	YES	Positive	TMPRSS2-ETV1		0.438623	0.463073	0.438623	-0.0558032	-0.00268605	-0.0558032	LN	NA	UNK	Adenocarcinoma	Naive	NA	Matched	PRAD	Prostate Cancer	Prostate Adenocarcinoma	1.93333
MO_1514_T	5115612	0.296774	0.400305		Michigan	No	Exposed	YES	Positive	TMPRSS2-ERG		0.605639	0.597099	0.605639	-0.0227637	0.0110429	-0.0227637	LN	NA	UNK	Adenocarcinoma	Exposed	NA	Matched	PRAD	Prostate Cancer	Prostate Adenocarcinoma	5.36667
SC_9176_T	9115539	1.73733	2.43761	9115539	Washington	No	Naive	YES	Negative			0.490541	0.531079	0.490541	-0.073359	-0.0273705	-0.073359	LN	66	9	Adenocarcinoma	Naive	1	Matched	PRAD	Prostate Cancer	Prostate Adenocarcinoma	1.5
SC_9178_T	9115541	0.048688	0.0425558	9115541	Washington	No	Naive	YES	Positive	TMPRSS2-ERG		0.525307	0.513955	0.525307	0.0128865	0.0588799	0.0128865	LN	72	9	Adenocarcinoma	Naive	NA	Matched	PRAD	Prostate Cancer	Prostate Adenocarcinoma	0.166667
SC_9146_T	9115517	0	0	9115517	Washington	No	Naive	YES	Negative			0.158827	0.167349	0.158827	0.312823	0.348118	0.312823	Prostate	77	6	Adenocarcinoma	Naive	NA	Matched	PRAD	Prostate Cancer	Prostate Adenocarcinoma	0.333333
SC_9181_T	9115551	0.720246	NA	9115551	Washington	No	Naive	YES	Positive	TMPRSS2-ERG		0.53353	NA	0.53353	-0.116788	NA	-0.116788	LN	82	7	Adenocarcinoma	Naive	1	Matched	PRAD	Prostate Cancer	Prostate Adenocarcinoma	2.7
SC_9183_T	9115552	0.0757801	NA	9115552	Washington	No	Naive	YES	Positive	TMPRSS2-ERG		0.579073	NA	0.579073	0.0382183	NA	0.0382183	LN	55	7	Adenocarcinoma	Naive	0	Matched	PRAD	Prostate Cancer	Prostate Adenocarcinoma	28.4
MO_1482_T	5115614	0	0		Michigan	Yes	Exposed	YES	Positive	CLTC-ETV1		0.249799	0.137066	0.249799	0.579302	0.611084	0.579302	Liver	NA	UNK	Small cell	Naive	NA	Matched	PRAD	Prostate Cancer	Prostate Adenocarcinoma	0.9
SC_9184_T	97115558	0.305667	0.318702	97115558-T-C-1	RoyalMarsden	No	Exposed	YES	Negative			0.339972	0.359608	0.339972	0.02998	0.075443	0.02998	Liver	66.6	9	Adenocarcinoma	Exposed	NA	Matched	PRAD	Prostate Cancer	Prostate Adenocarcinoma	1.8
SC_9186_T	97115560	1.36697	1.02882	97115560-T-A-1	RoyalMarsden	No	Exposed	YES	Positive	TMPRSS2-ERG		0.649993	0.670706	0.649993	0.0388626	0.071331	0.0388626	LN	68.9	UNK	Adenocarcinoma	Exposed	NA	Matched	PRAD	Prostate Cancer	Prostate Adenocarcinoma	1.43333
SC_9187_T	97115561	0.70252	1.10141	97115561-T-A-1	RoyalMarsden	No	Exposed	YES	Positive	TMPRSS2-ERG		0.351564	0.345307	0.351564	-0.0742524	-0.0281566	-0.0742524	Liver	67.8	9	Adenocarcinoma	Exposed	NA	Matched	PRAD	Prostate Cancer	Prostate Adenocarcinoma	2.2
SC_9189_T	97115563	9.44428	9.83475	97115563-T-C-1	RoyalMarsden	No	Exposed	YES	Positive	TMPRSS2-ERG		0.637815	0.661856	0.637815	-0.106988	-0.0451929	-0.106988	LN	67.6	UNK	Adenocarcinoma	Exposed	NA	Matched	PRAD	Prostate Cancer	Prostate Adenocarcinoma	1.96667
SC_9190_T	97115564	0.846957	0.349424	97115564-T-A-1	RoyalMarsden	No	Naive	YES	Positive	TMPRSS2-ERG		0.543655	0.519765	0.543655	-0.103633	-0.0751152	-0.103633	Bone	63.8	UNK	Adenocarcinoma	Exposed	NA	Matched	PRAD	Prostate Cancer	Prostate Adenocarcinoma	2.63333
SC_9192_T	9115553	1.1742	1.03175	9115553	Washington	NA	Naive	YES	Negative			0.303212	0.381666	0.303212	-0.0275644	0.0080612	-0.0275644	Bone	64	9	Inadequate for diagnosis	Exposed	NA	Matched	PRAD	Prostate Cancer	Prostate Adenocarcinoma	1.5
SC_9194_T	9115568	5.72758	7.81897	9115568	Washington	No	Exposed	YES	Positive	TMPRSS2-ERG		0.557996	0.58926	0.557996	-0.0688777	-0.0156753	-0.0688777	LN	66	7	Adenocarcinoma	Naive	NA	Matched	PRAD	Prostate Cancer	Prostate Adenocarcinoma	0.0333333
MO_1556_T	5115651	0.0640609	0.0831619		Michigan	NA	Naive	YES	Positive	TMPRSS2-ERG		0.480467	0.504681	0.480467	-0.0504563	0.00409898	-0.0504563	LN	NA	UNK	Not available	Naive	NA	Matched	PRAD	Prostate Cancer	Prostate Adenocarcinoma	2.86667
SC_9069_T	9115171	2.92984	3.01417	9115171	Washington	No	Exposed	YES	Positive	TMPRSS2-ERG		0.568899	0.616301	0.568899	-0.0139736	0.0371785	-0.0139736	Bone	72.3	11	Adenocarcinoma	Naive	NA	Matched	PRAD	Prostate Cancer	Prostate Adenocarcinoma	1.36667
MO_1012-Tumor-Subcutaneous_nodule	6115012	0	NA	6115012	MSK	No	Naive	YES	Negative			-0.0187005	NA	-0.0187005	0.415112	NA	0.415112	Other Soft tissue	71.4	7	Adenocarcinoma	Exposed	NA	Matched	PRAD	Prostate Cancer	Prostate Adenocarcinoma	36.7333
MO_1013-Tumor	6115013	2.96783	NA	6115013	MSK	No	Exposed	YES	Negative			0.368749	NA	0.368749	-0.0542227	NA	-0.0542227	LN	55	8	Adenocarcinoma	Exposed	NA	Matched	PRAD	Prostate Cancer	Prostate Adenocarcinoma	7.53333
MO_1014-Tumor	6115014	0.945581	NA	6115014	MSK	No	Exposed	YES	Negative			0.516237	NA	0.516237	-0.0703068	NA	-0.0703068	LN	65	8	Adenocarcinoma	Naive	NA	Matched	PRAD	Prostate Cancer	Prostate Adenocarcinoma	4.13333
MO_1020-Tumor	5115024	0	NA	5115024	Michigan	No	Naive	YES	Negative			0.307207	NA	0.307207	0.0993446	NA	0.0993446	Liver	63	8	Adenocarcinoma	Naive	NA	Matched	PRAD	Prostate Cancer	Prostate Adenocarcinoma	1.63333
MO_1015-Tumor	5115023	0	0.415812	5115023	Michigan	No	Naive	YES	Positive	TMPRSS2-ERG		0.0342185	0.513758	0.0342185	0.204483	0.0950122	0.204483	LN	75	8	Adenocarcinoma	Exposed	NA	Matched	PRAD	Prostate Cancer	Prostate Adenocarcinoma	1.66667
MO_1040-Tumor	5115026	0.295067	0.0661054	5115026	Michigan	No	Naive	YES	Positive	TMPRSS2-ERG		0.504188	0.543859	0.504188	-0.126508	-0.0814879	-0.126508	LN	68.1	7	Adenocarcinoma	Naive	NA	Matched	PRAD	Prostate Cancer	Prostate Adenocarcinoma	1.66667
MO_1054-Tumor	5115027	0.241376	0.280566	5115027	Michigan	No	Naive	YES	Positive	TMPRSS2-ETV4		0.457716	0.475205	0.457716	-0.113462	-0.0246518	-0.113462	Prostate	56	9	Adenocarcinoma	Exposed	NA	Matched	PRAD	Prostate Cancer	Prostate Adenocarcinoma	1.36667
MO_1071-Tumor	5115028	0.046007	0.0154237	5115028	Michigan	No	Naive	YES	Positive	TMPRSS2-ERG		0.4336	0.396554	0.4336	-0.0468648	-0.0193476	-0.0468648	Prostate	54	7	Adenocarcinoma	Exposed	NA	Matched	PRAD	Prostate Cancer	Prostate Adenocarcinoma	1.53333
MO_1074-Tumor	5115029	16.3014	6.29476	5115029	Michigan	No	On treatment	YES	Negative			0.52037	0.476629	0.52037	0.0802286	0.137899	0.0802286	Bone	69	7	Adenocarcinoma	Exposed	NA	Matched	PRAD	Prostate Cancer	Prostate Adenocarcinoma	2.86667
MO_1084-Tumor	5115030	0	0.803078	5115030	Michigan	NA	Naive	YES	Positive	TMPRSS2-ERG		0.478249	0.590949	0.478249	-0.056331	0.00903847	-0.056331	LN	77	6	Inadequate for diagnosis	Naive	NA	Matched	PRAD	Prostate Cancer	Prostate Adenocarcinoma	1.83333
MO_1094-Tumor	5115031	0	0	5115031	Michigan	No	Naive	YES	Negative		KIAA1549-BRAF	-0.0821161	-0.0770353	-0.0821161	0.18759	0.246254	0.18759	Bone	67	9	Adenocarcinoma	Naive	1	Matched	PRAD	Prostate Cancer	Prostate Adenocarcinoma	1.43333
MO_1095-Tumor	5115032	0.293267	0.161611	5115032	Michigan	No	Naive	YES	Positive	TMPRSS2-ERG		0.398342	0.423779	0.398342	-0.112813	-0.0518224	-0.112813	Other Soft tissue	71.9	9	Adenocarcinoma	Naive	NA	Matched	PRAD	Prostate Cancer	Prostate Adenocarcinoma	1.6
TP_2001-Tumor	5115033	2.28069	1.37092	5115033	Michigan	No	Naive	YES	Positive	TMPRSS2-ERG		0.480306	0.513974	0.480306	-0.129553	-0.0544672	-0.129553	LN	70	9	Adenocarcinoma	Exposed	NA	Matched	PRAD	Prostate Cancer	Prostate Adenocarcinoma	1.03333
TP_2010-Tumor	5115057	0.908096	0.264147	5115057	Michigan	No	Naive	YES	Negative			0.477873	0.473222	0.477873	-0.0723693	-0.048447	-0.0723693	LN	64	9	Adenocarcinoma	Exposed	NA	Matched	PRAD	Prostate Cancer	Prostate Adenocarcinoma	1.93333
TP_2009-Tumor	5115034	0.139499	0.378762	5115034	Michigan	No	Naive	YES	Positive	CANT1-ETV4		0.462358	0.443766	0.462358	0.0307729	0.0512662	0.0307729	Bone	58	9	Adenocarcinoma	Naive	NA	Matched	PRAD	Prostate Cancer	Prostate Adenocarcinoma	3.16667
SC_9007-Tumor	9115042	0.137248	0	9115042	Washington	No	Exposed	YES	Positive	GRHL2-FLI1		0.448548	0.399127	0.448548	0.0792282	0.146565	0.0792282	LN	65.8	7	Adenocarcinoma	Naive	NA	Matched	PRAD	Prostate Cancer	Prostate Adenocarcinoma	1.3
SC_9012-Tumor	9115046	0.0286363	0	9115046	Washington	No	Naive	YES	Negative			0.303105	0.23622	0.303105	0.104519	0.10751	0.104519	Liver	74	8	Adenocarcinoma	UNK	NA	Matched	PRAD	Prostate Cancer	Prostate Adenocarcinoma	1.66667
MO_1114-Tumor	5115073	13.9181	7.55276	5115073	Michigan	No	Exposed	YES	Positive	TMPRSS2-ERG		0.424982	0.444623	0.424982	-0.0970399	-0.0891229	-0.0970399	LN	62	7	Adenocarcinoma	Exposed	NA	Matched	PRAD	Prostate Cancer	Prostate Adenocarcinoma	1.96667
MO_1118-TM	5115258	0	0	5115258	Michigan	Yes	Naive	YES	Positive	TMPRSS2-ERG		0.0342406	0.0105128	0.0342406	0.768063	0.71296	0.768063	Liver	73	9	Adenocarcinoma with NE features	Exposed	NA	Matched	PRAD	Prostate Cancer	Prostate Adenocarcinoma	1.6
MO_1128-Tumor	5115075	1.1979	NA	5115075	Michigan	No	Naive	YES	Negative			0.403902	NA	0.403902	-0.0985254	NA	-0.0985254	LN	71	7	Adenocarcinoma	Naive	1	Matched	PRAD	Prostate Cancer	Prostate Adenocarcinoma	1.76667
MO_1124-Tumor	5115058	0.0313253	0	5115058	Michigan	No	Naive	YES	Positive	TMPRSS2-ERG		0.451808	0.420828	0.451808	0.0242931	0.0677956	0.0242931	Other Soft tissue	66	UNK	Adenocarcinoma	Naive	NA	Matched	PRAD	Prostate Cancer	Prostate Adenocarcinoma	2.76667
SC_9016-Tumor	9115050	0.472263	1.47692	9115050	Washington	No	Exposed	YES	Positive	TMPRSS2-ERG		0.513986	0.453005	0.513986	0.0818273	-0.0353951	0.0818273	LN	69	6	Adenocarcinoma	Naive	NA	Matched	PRAD	Prostate Cancer	Prostate Adenocarcinoma	2.1
SC_9017-Tumor	9115055	0	0	9115055	Washington	No	Naive	YES	Positive	TMPRSS2-ERG		0.401926	0.369423	0.401926	0.0879568	0.0718477	0.0879568	Liver	65.9	9	Adenocarcinoma	Naive	NA	Matched	PRAD	Prostate Cancer	Prostate Adenocarcinoma	1
SC_9019-Tumor	9115045	0.535331	0.460033	9115045	Washington	No	Exposed	YES	Positive	RP11-356O9.1-ETV1		0.400262	0.34774	0.400262	-0.0807594	-0.0595235	-0.0807594	Bone	85.8	6	Adenocarcinoma	Naive	NA	Matched	PRAD	Prostate Cancer	Prostate Adenocarcinoma	1.93333
SC_9022-Tumor	97115001	8.44051	4.24065	97115001-T-A-1	RoyalMarsden	No	Naive	YES	Positive	TMPRSS2-ERG		0.363667	0.336293	0.363667	-0.0645057	-0.0232302	-0.0645057	Other Soft tissue	65.9	7	Adenocarcinoma	Exposed	NA	Matched	PRAD	Prostate Cancer	Prostate Adenocarcinoma	4.26667
SC_9023-Tumor	97115002	2.50818	2.8483	97115002-T-C-1	RoyalMarsden	No	Naive	YES	Negative			0.295495	0.278662	0.295495	-0.0526405	-0.062527	-0.0526405	Bone	78	UNK	Adenocarcinoma	Naive	NA	Matched	PRAD	Prostate Cancer	Prostate Adenocarcinoma	2.4
TP_2020-Tumor	5115127	1.34818	1.04808	5115127	Michigan	NA	Exposed	YES	Positive	GPR179-ETV4		0.436947	0.477459	0.436947	-0.144383	-0.108993	-0.144383	Bone	55	UNK	Inadequate for diagnosis	Naive	NA	Matched	PRAD	Prostate Cancer	Prostate Adenocarcinoma	1.96667
SC_9026-Tumor	9115060	0.131195	0.116647	9115060	Washington	No	Naive	YES	Positive	TMPRSS2-ERG		0.524489	0.558044	0.524489	-0.046421	-0.0223817	-0.046421	Bone	65	UNK	Adenocarcinoma	Naive	0	Matched	PRAD	Prostate Cancer	Prostate Adenocarcinoma	1.73333
SC_9028-Tumor	9115061	0	0	9115061	Washington	No	Naive	YES	Positive	AGR2-ETV1		0.362043	0.326126	0.362043	-0.0648624	0.0156123	-0.0648624	Prostate	71	9	Adenocarcinoma	Naive	NA	Matched	PRAD	Prostate Cancer	Prostate Adenocarcinoma	3.53333
SC_9029-Tumor	9115062	0.393961	0.429122	9115062	Washington	No	Naive	YES	Negative			0.613318	0.652461	0.613318	-0.156136	-0.109772	-0.156136	Other Soft tissue	75	7	Adenocarcinoma	Naive	NA	Matched	PRAD	Prostate Cancer	Prostate Adenocarcinoma	4.43333
TP_2032-Tumor	5115078	1.66051	1.05813	5115078	Michigan	No	Exposed	YES	Negative			0.484157	0.528435	0.484157	-0.0366519	-0.000483278	-0.0366519	LN	74	9	Adenocarcinoma	Exposed	NA	Matched	PRAD	Prostate Cancer	Prostate Adenocarcinoma	1.73333
SC_9030-Tumor	97115005	6.67816	3.84323	97115005-T-C-1	RoyalMarsden	No	Exposed	YES	Negative			0.588467	0.598795	0.588467	-0.0741094	-0.0343516	-0.0741094	Other Soft tissue	65.7	10	Adenocarcinoma	Exposed	NA	Matched	PRAD	Prostate Cancer	Prostate Adenocarcinoma	2.53333
MO_1161-TM	5115259	3.0902	1.14648	5115259	Michigan	No	Exposed	YES	Positive	TMPRSS2-ERG		0.463526	0.429871	0.463526	0.0964543	0.1334	0.0964543	Liver	65	10	Adenocarcinoma	Exposed	NA	Matched	PRAD	Prostate Cancer	Prostate Adenocarcinoma	1.56667
SC_9032-Tumor	9115063	8.51593	3.89711	9115063	Washington	No	Naive	YES	Negative			0.624217	0.631746	0.624217	-0.050834	-0.00363803	-0.050834	LN	79.9	6	Adenocarcinoma	Exposed	NA	Matched	PRAD	Prostate Cancer	Prostate Adenocarcinoma	5.2
SC_9034-Tumor	9115066	0	0	9115066	Washington	No	Naive	YES	Positive	TMPRSS2-ERG		0.412106	0.367712	0.412106	0.0380574	0.0898638	0.0380574	Bone	65	9	Adenocarcinoma	Naive	NA	Matched	PRAD	Prostate Cancer	Prostate Adenocarcinoma	4.5
SC_9036-Tumor	9115067	1.53562	0.907399	9115067	Washington	No	Naive	YES	Negative			0.572862	0.542704	0.572862	-0.0853214	-0.0524406	-0.0853214	LN	72	8	Adenocarcinoma	Naive	1	Matched	PRAD	Prostate Cancer	Prostate Adenocarcinoma	2.23333
SC_9037-Tumor	9115069	0.0747105	0.099103	9115069	Washington	No	Naive	YES	Positive	TMPRSS2-ERG		0.246841	0.214682	0.246841	0.0241795	0.098586	0.0241795	Liver	64.9	9	Adenocarcinoma	Naive	1	Matched	PRAD	Prostate Cancer	Prostate Adenocarcinoma	0.133333
SC_9018-Tumor	9115052	1.1021	0.744584	9115052	Washington	No	On treatment	YES	Positive	TMPRSS2-ERG		0.520691	0.48911	0.520691	-0.140343	-0.0939196	-0.140343	Bone	73.2	8	Adenocarcinoma	Exposed	NA	Matched	PRAD	Prostate Cancer	Prostate Adenocarcinoma	1.53333
SC_9043-Tumor	9115102	2.12995	0.851358	9115102	Washington	No	Naive	YES	Positive	TMPRSS2-ERG		0.513552	0.519401	0.513552	-0.0941466	-0.0698963	-0.0941466	Bone	68	7	Adenocarcinoma	Naive	1	Matched	PRAD	Prostate Cancer	Prostate Adenocarcinoma	1.3
MO_1179-Tumor	5115129	0	0	5115129	Michigan	NA	Naive	YES	Positive	TMPRSS2-ERG		0.359682	0.381326	0.359682	0.00419135	-0.00181555	0.00419135	Bone	75	9	Inadequate for diagnosis	Naive	NA	Matched	PRAD	Prostate Cancer	Prostate Adenocarcinoma	2.2
MO_1184-Tumor	5115130	0	0	5115130	Michigan	No	Naive	YES	Negative			0.487833	0.428494	0.487833	0.0563007	0.0218855	0.0563007	Liver	71	9	Adenocarcinoma	Naive	NA	Matched	PRAD	Prostate Cancer	Prostate Adenocarcinoma	3.83333
SC_9046-Tumor	97115007	1.52896	0.806662	97115007-T-A-1	RoyalMarsden	No	Exposed	YES	Positive	TMPRSS2-ERG		0.51894	0.496287	0.51894	-0.0166374	0.0502854	-0.0166374	Liver	71.5	8	Adenocarcinoma	Exposed	NA	Matched	PRAD	Prostate Cancer	Prostate Adenocarcinoma	2.8
SC_9047-Tumor	97115009	3.00874	1.58411	97115009-T-A-1	RoyalMarsden	No	Exposed	YES	Negative			0.525027	0.524251	0.525027	-0.0992191	-0.0353787	-0.0992191	Bone	73	UNK	Adenocarcinoma	Exposed	NA	Matched	PRAD	Prostate Cancer	Prostate Adenocarcinoma	32.5
SC_9048-Tumor	97115071	1.53136	0.888521	97115071-T-A-1	RoyalMarsden	NA	Exposed	YES	Negative			0.436893	0.420518	0.436893	-0.105445	-0.0586022	-0.105445	Bone	72.9	9	Inadequate for diagnosis	Exposed	NA	Matched	PRAD	Prostate Cancer	Prostate Adenocarcinoma	1.73333
SC_9049-Tumor	97115074	3.81665	1.97124	97115074-T-A-1	RoyalMarsden	No	UNK	YES	Positive	TMPRSS2-ERG		0.431379	0.410384	0.431379	-0.0183103	0.0225808	-0.0183103	Bone	70	8	Adenocarcinoma	Naive	NA	Matched	PRAD	Prostate Cancer	Prostate Adenocarcinoma	1.96667
SC_9054-Tumor	9115107	2.25923	1.93878	9115107	Washington	No	UNK	YES	Negative			0.595415	0.579197	0.595415	0.00405774	0.0200953	0.00405774	LN	72.1	10	Adenocarcinoma	Naive	NA	Matched	PRAD	Prostate Cancer	Prostate Adenocarcinoma	4.4
MO_1176-Tumor	5115186	0.347693	0.332217	5115186	Michigan	No	Naive	YES	Positive	TMPRSS2-ERG		0.521441	0.563266	0.521441	0.0307287	0.0997456	0.0307287	LN	55.3	10	Adenocarcinoma	Naive	1	Matched	PRAD	Prostate Cancer	Prostate Adenocarcinoma	2.8
MO_1192-Tumor	5115128	1.9316	1.12526	5115128	Michigan	No	Naive	YES	Positive	TMPRSS2-ERG		0.551797	0.516668	0.551797	-0.0927662	-0.052157	-0.0927662	LN	62	8	Adenocarcinoma	Naive	NA	Matched	PRAD	Prostate Cancer	Prostate Adenocarcinoma	1.23333
SC_9050-Tumor	9115104	4.8939	1.79851	9115104	Washington	No	Naive	YES	Positive	SLC45A3-ERG		0.496069	0.467128	0.496069	-0.114832	-0.0888329	-0.114832	LN	78	6	Adenocarcinoma	Naive	NA	Matched	PRAD	Prostate Cancer	Prostate Adenocarcinoma	0.466667
SC_9038-Tumor	9115068	3.40431	NA	9115068	Washington	No	Exposed	YES	Negative			0.490931	NA	0.490931	-0.00725664	NA	-0.00725664	LN	70	8	Adenocarcinoma	Exposed	NA	Matched	PRAD	Prostate Cancer	Prostate Adenocarcinoma	3.1
SC_9055-Tumor	9115109	1.44082	1.32174	9115109	Washington	No	Naive	YES	Positive	ALOX15B-ETV1		0.532595	0.568266	0.532595	-0.153091	-0.0868449	-0.153091	LN	59	9	Adenocarcinoma	Naive	1	Matched	PRAD	Prostate Cancer	Prostate Adenocarcinoma	2.33333
MO_1215-Tumor	5115158	0	0	5115158	Michigan	Yes	Exposed	YES	Positive	TMPRSS2-ERG		-0.0126996	-0.0361401	-0.0126996	0.775059	0.726437	0.775059	Other Soft tissue	65	7	Adenocarcinoma with NE features	Exposed	NA	Matched	PRAD	Prostate Cancer	Prostate Adenocarcinoma	4.83333
MO_1219-Tumor	5115203	0	0.0368895	5115203	Michigan	No	Naive	YES	Negative			0.482821	0.495278	0.482821	0.00711876	0.0627772	0.00711876	Bone	67.5	7	Adenocarcinoma	Naive	NA	Matched	PRAD	Prostate Cancer	Prostate Adenocarcinoma	1.13333
MO_1221-Tumor	5115194	0.108799	0.175395	5115194	Michigan	NA	Exposed	YES	Negative			0.463315	0.521591	0.463315	-0.0734812	-0.0737008	-0.0734812	Bone	58.5	9	Inadequate for diagnosis	Exposed	NA	Matched	PRAD	Prostate Cancer	Prostate Adenocarcinoma	0.0666667
MO_1232-Tumor	5115195	0.477998	0.248025	5115195	Michigan	No	Exposed	YES	Negative			0.430181	0.423468	0.430181	-0.0545421	-0.0204174	-0.0545421	Bone	64.6	9	Adenocarcinoma	Exposed	NA	Matched	PRAD	Prostate Cancer	Prostate Adenocarcinoma	6.96667
SC_9057-Tumor	97115125	0.242352	0.220459	97115125-T-A-1	RoyalMarsden	No	Naive	YES	Positive	HNRNPA2B1-ETV1		0.531803	0.551291	0.531803	-0.0702005	-0.038442	-0.0702005	Other Soft tissue	58.8	9	Adenocarcinoma	Naive	1	Matched	PRAD	Prostate Cancer	Prostate Adenocarcinoma	3.1
SC_9058-Tumor	97115079	3.25122	2.30067	97115079-T-A-1	RoyalMarsden	No	Naive	YES	Negative		GOLGA4-RAF1	0.623169	0.615513	0.623169	-0.0922003	-0.050188	-0.0922003	LN	70	9	Adenocarcinoma	Exposed	NA	Matched	PRAD	Prostate Cancer	Prostate Adenocarcinoma	7.1
SC_9059-Tumor	97115131	4.01814	1.62075	97115131-T-A-1	RoyalMarsden	No	Exposed	YES	Positive	TMPRSS2-ERG		0.533909	0.544046	0.533909	-0.035715	0.00484899	-0.035715	LN	61	8	Adenocarcinoma	Exposed	NA	Matched	PRAD	Prostate Cancer	Prostate Adenocarcinoma	1.73333
SC_9060-Tumor	97115095	0.0541982	0.0257437	97115095-T-A-1	RoyalMarsden	No	Exposed	YES	Positive	TMPRSS2-ERG		0.307023	0.291389	0.307023	0.0585853	0.109103	0.0585853	Liver	65.2	8	Adenocarcinoma	Exposed	NA	Matched	PRAD	Prostate Cancer	Prostate Adenocarcinoma	3.8
MO_1241-Tumor	5115160	1.91518	1.10717	5115160	Michigan	No	Naive	YES	Positive	TMPRSS2-ERG		0.52972	0.486335	0.52972	0.0988176	0.112581	0.0988176	Liver	75	10	Adenocarcinoma	Naive	NA	Matched	PRAD	Prostate Cancer	Prostate Adenocarcinoma	1.8
MO_1244-Tumor	5115196	7.07223	3.54348	5115196	Michigan	No	Exposed	YES	Positive	TMPRSS2-ERG		0.543852	0.518521	0.543852	-0.0167129	0.0180647	-0.0167129	Liver	57.6	9	Adenocarcinoma	Naive	NA	Matched	PRAD	Prostate Cancer	Prostate Adenocarcinoma	1.43333
MO_1249-Tumor	5115197	3.43271	2.71723	5115197	Michigan	No	Exposed	YES	Positive	TMPRSS2-ERG		0.413777	0.412465	0.413777	-0.0386316	-0.00539413	-0.0386316	LN	69.6	UNK	Adenocarcinoma	Exposed	NA	Matched	PRAD	Prostate Cancer	Prostate Adenocarcinoma	2.9
MO_1262-Tumor	5115187	6.82612	4.10657	5115187	Michigan	No	Naive	YES	Positive	TMPRSS2-ETV4		0.666385	0.63566	0.666385	-0.0822161	-0.05287	-0.0822161	LN	52.7	7	Adenocarcinoma	Exposed	NA	Matched	PRAD	Prostate Cancer	Prostate Adenocarcinoma	2.36667
SC_9061-Tumor	97115147	9.99619	6.01383	97115147-T-A-1	RoyalMarsden	No	Exposed	YES	Positive	TMPRSS2-ERG		0.567767	0.550822	0.567767	-0.0368367	-0.00855217	-0.0368367	Bone	71	9	Adenocarcinoma	Exposed	NA	Matched	PRAD	Prostate Cancer	Prostate Adenocarcinoma	6.6
SC_9062-Tumor	97115148	2.08631	0.779369	97115148-T-A-1	RoyalMarsden	No	Exposed	YES	Negative			0.296046	0.256449	0.296046	0.0510216	0.0721257	0.0510216	LN	54	9	Adenocarcinoma	Exposed	NA	Matched	PRAD	Prostate Cancer	Prostate Adenocarcinoma	0.233333
SC_9063-Tumor	97115151	1.52894	1.27827	97115151-T-A-1	RoyalMarsden	No	Exposed	YES	Positive	TMPRSS2-ERG		0.539134	0.509908	0.539134	-0.100173	-0.0889922	-0.100173	LN	65.9	6	Adenocarcinoma	Naive	NA	Matched	PRAD	Prostate Cancer	Prostate Adenocarcinoma	1.56667
MO_1202-Tumor	5115193	1.04004	0.550681	5115193	Michigan	No	Naive	YES	Positive	TMPRSS2-ERG		0.466527	0.449064	0.466527	-0.022196	0.0114685	-0.022196	Liver	69.8	7	Adenocarcinoma	Naive	NA	Matched	PRAD	Prostate Cancer	Prostate Adenocarcinoma	1.96667
MO_1277-TM	5115261	7.62305	4.46524	5115261	Michigan	No	Exposed	YES	Positive	TMPRSS2-ERG		0.526799	0.507454	0.526799	-0.0759774	-0.0396574	-0.0759774	Bone	54	8	Adenocarcinoma	Naive	NA	Matched	PRAD	Prostate Cancer	Prostate Adenocarcinoma	1.96667
SC_9016_T	9115050	4.26388	2.90296			No	Exposed	YES	Positive	TMPRSS2-ERG		0.409259	0.428486	0.409259	-0.104791	-0.0683058	-0.104791	Bone	69	6	Adenocarcinoma	Naive	NA	Matched	PRAD	Prostate Cancer	Prostate Adenocarcinoma	2.2
SC_9068-Tumor	9115175	1.04975	0.404737	9115175	Washington	No	Naive	YES	Positive	SLC45A3-ERG		0.513924	0.551455	0.513924	-0.0965116	-0.0346241	-0.0965116	LN	74	7	Adenocarcinoma	Naive	1	Matched	PRAD	Prostate Cancer	Prostate Adenocarcinoma	4.8
SC_9071-TM	97115166	0.0895732	0.445123	97115166-T-A-1	RoyalMarsden	NA	Exposed	YES	Positive	TMPRSS2-ERG		0.30354	0.345697	0.30354	-0.120238	-0.0995978	-0.120238	Bone	66.8	7	Inadequate for diagnosis	Exposed	NA	Matched	PRAD	Prostate Cancer	Prostate Adenocarcinoma	2.7
SC_9072-TM	97115167	5.45441	3.87127	97115167-T-A-1	RoyalMarsden	No	Exposed	YES	Positive	TCAF-ETV1		0.604624	0.58526	0.604624	-0.108177	-0.0816159	-0.108177	Bone	73.8	UNK	Adenocarcinoma	Exposed	NA	Matched	PRAD	Prostate Cancer	Prostate Adenocarcinoma	5.23333
SC_9073-TM	9115185	9.62082	7.74485	9115185	Washington	No	Exposed	YES	Negative			0.546285	0.551609	0.546285	-0.0371532	0.00657067	-0.0371532	LN	65.8	9	Adenocarcinoma	Exposed	NA	Matched	PRAD	Prostate Cancer	Prostate Adenocarcinoma	0.966667
TP_2054-TM	5115254	0.0281417	0.139732	5115254	Michigan	No	Naive	YES	Positive	TMPRSS2-ERG		0.539951	0.533448	0.539951	0.0555047	0.0877137	0.0555047	LN	70.7	10	Adenocarcinoma	Naive	NA	Matched	PRAD	Prostate Cancer	Prostate Adenocarcinoma	4.96667
MO_1316-TM	5115256	0.335623	0.259502	5115256	Michigan	No	Exposed	YES	Positive	TMPRSS2-ERG		0.656332	0.652816	0.656332	-0.029147	-0.00482467	-0.029147	LN	70	6	Adenocarcinoma	Naive	NA	Matched	PRAD	Prostate Cancer	Prostate Adenocarcinoma	2.56667
SC_9080-TM	9115111	5.12313	6.14594	9115111	Washington	No	Naive	YES	Negative			0.495507	0.52536	0.495507	-0.0393221	-0.00428766	-0.0393221	LN	76	8	Adenocarcinoma	Naive	NA	Matched	PRAD	Prostate Cancer	Prostate Adenocarcinoma	2.26667
SC_9081-TM	9115181	0.312813	0.258259	9115181	Washington	No	Naive	YES	Negative			0.520479	0.528272	0.520479	0.0436087	0.0668282	0.0436087	LN	69	7	Adenocarcinoma	Naive	1	Matched	PRAD	Prostate Cancer	Prostate Adenocarcinoma	23.4
SC_9065-TM-Tumor2	9115174	0.0249883	0.0441102		Washington	NA	Exposed	YES	Positive	FASN-ETV4		0.486691	0.540618	0.486691	-0.0368493	-0.00817972	-0.0368493	Bone	78	7	Not available	Naive	NA	Matched	PRAD	Prostate Cancer	Prostate Adenocarcinoma	3.8
SC_9083-TM	9115338	7.42101	5.98548	9115338	Washington	No	Naive	YES	Negative			0.320815	0.343514	0.320815	-0.107676	-0.0536871	-0.107676	Bone	62	8	Adenocarcinoma	Naive	1	Matched	PRAD	Prostate Cancer	Prostate Adenocarcinoma	7.73333
SC_9031-TM	97115006	0	0	97115006-T-C-1	RoyalMarsden	No	Naive	YES	Negative			0.0298437	0.002927	0.0298437	0.672071	0.663232	0.672071	Liver	39.5	7	Adenocarcinoma	Naive	NA	Matched	PRAD	Prostate Cancer	Prostate Adenocarcinoma	1.23333
MO_1336-TM	5115260	1.3907	1.72143	5115260	Michigan	NA	Naive	YES	Negative			0.53421	0.609259	0.53421	-0.0596469	-0.0264	-0.0596469	Bone	75	6	Inadequate for diagnosis	Naive	0	Matched	PRAD	Prostate Cancer	Prostate Adenocarcinoma	0.266667
MO_1337-TM	5115255	0.401384	0.369191	5115255	Michigan	No	Naive	YES	Positive	TMPRSS2-ERG		0.479629	0.467225	0.479629	-0.0396515	-0.00906459	-0.0396515	Liver	62	7	Adenocarcinoma	Naive	NA	Matched	PRAD	Prostate Cancer	Prostate Adenocarcinoma	1.5
MO_1339-TM	5115290	0.560017	0.389062	5115290	Michigan	No	Naive	YES	Negative			0.520547	0.508121	0.520547	-0.00400557	0.0104746	-0.00400557	LN	78	8	Adenocarcinoma	Naive	NA	Matched	PRAD	Prostate Cancer	Prostate Adenocarcinoma	1.96667
SC_9086-TM	9115341	0.166775	0.179972	9115341	Washington	No	Naive	YES	Positive	TMPRSS2-ERG		0.440457	0.447947	0.440457	-0.0927451	-0.0399288	-0.0927451	Bone	72	9	Adenocarcinoma	Naive	NA	Matched	PRAD	Prostate Cancer	Prostate Adenocarcinoma	1.86667
SC_9091-TM	13115262	0.437944	1.2531	13115262-T-A-1	Karmanos	No	Naive	YES	Negative			0.51775	0.513167	0.51775	-0.0177819	-0.00236304	-0.0177819	Bone	60	UNK	Adenocarcinoma	Naive	NA	Matched	PRAD	Prostate Cancer	Prostate Adenocarcinoma	1.46667
TP_2060-TM	5115276	0	0	5115276	Michigan	No	Naive	YES	Negative			0.405016	0.37712	0.405016	0.0775815	0.127634	0.0775815	LN	72	10	Adenocarcinoma	Naive	1	Matched	PRAD	Prostate Cancer	Prostate Adenocarcinoma	3.8
TP_2061-TM	5115291	0.275151	0.326779	5115291	Michigan	No	Exposed	YES	Negative			0.330633	0.336969	0.330633	0.108223	0.105973	0.108223	Other Soft tissue	64.7	9	Adenocarcinoma	Naive	NA	Matched	PRAD	Prostate Cancer	Prostate Adenocarcinoma	2.53333
TP_2064-TM	5115327	3.02571	2.52564	5115327	Michigan	No	Naive	YES	Negative			0.655058	0.648067	0.655058	-0.124535	-0.0804563	-0.124535	LN	71	7	Adenocarcinoma	Naive	1	Matched	PRAD	Prostate Cancer	Prostate Adenocarcinoma	3.46667
SC_9092-TM	9115339	6.27022	5.57379	9115339	Washington	No	Naive	YES	Positive	TMPRSS2-ERG		0.463803	0.474495	0.463803	-0.115279	-0.0691423	-0.115279	Bone	76	7	Adenocarcinoma	Naive	1	Matched	PRAD	Prostate Cancer	Prostate Adenocarcinoma	4.4
SC_9093-TM	13115277	4.76327	5.78635	13115277-T-A-1	Karmanos	No	Naive	YES	Negative		LSM1-BRAF	0.541646	0.601033	0.541646	-0.0883242	-0.0125526	-0.0883242	Other Soft tissue	56	10	Adenocarcinoma	Exposed	NA	Matched	PRAD	Prostate Cancer	Prostate Adenocarcinoma	4.36667
SC_9097-TM	97115281	10.7555	11.1152	97115281-T-A-1	RoyalMarsden	No	Exposed	YES	Positive	TMPRSS2-ERG		0.546253	0.566808	0.546253	-0.11823	-0.0805923	-0.11823	LN	69.9	9	Adenocarcinoma	Exposed	NA	Matched	PRAD	Prostate Cancer	Prostate Adenocarcinoma	4.86667
SC_9094-Tumor	97115278	2.0811	1.51522	97115278-T-A-1	RoyalMarsden	NA	Exposed	YES	Negative			0.452826	0.46488	0.452826	-0.130311	-0.0833212	-0.130311	Bone	60.8	9	Inadequate for diagnosis	Exposed	NA	Matched	PRAD	Prostate Cancer	Prostate Adenocarcinoma	4.2
SC_9099-Tumor	97115315	14.6136	9.6362	97115315-T-A-1	RoyalMarsden	No	Exposed	YES	Positive	SLC45A3-ERG		0.596777	0.599966	0.596777	-0.078528	-0.0493353	-0.078528	LN	78.7	7	Adenocarcinoma	Exposed	NA	Matched	PRAD	Prostate Cancer	Prostate Adenocarcinoma	4.3
SC_9100-Tumor	97115316	3.32026	2.1938	97115316-T-A-1	RoyalMarsden	No	Exposed	YES	Negative			0.317903	0.309204	0.317903	-0.11047	-0.0563449	-0.11047	Bone	73.9	7	Adenocarcinoma	Exposed	NA	Matched	PRAD	Prostate Cancer	Prostate Adenocarcinoma	5.8
SC_9035_T	9115065	8.47726	5.02434			NA	Exposed	YES	Positive	TMPRSS2-ERG		0.55927	0.541295	0.55927	-0.0457633	-0.0386313	-0.0457633	Adrenal	70	9	Not available	Naive	NA	Matched	PRAD	Prostate Cancer	Prostate Adenocarcinoma	2.86667
SC_9103-Tumor	97115330	0.877448	0.656345	97115330-T-A-1	RoyalMarsden	No	Exposed	YES	Negative			0.332432	0.333559	0.332432	-0.0689306	-0.0324128	-0.0689306	Bone	67.9	7	Adenocarcinoma	Exposed	NA	Matched	PRAD	Prostate Cancer	Prostate Adenocarcinoma	3.66667
SC_9104-Tumor	97115331	5.46187	2.58327	97115331-T-A-1	RoyalMarsden	No	Exposed	YES	Positive	TMPRSS2-ERG		0.532529	0.497604	0.532529	-0.138614	-0.0930395	-0.138614	LN	69.9	7	Adenocarcinoma	Exposed	NA	Matched	PRAD	Prostate Cancer	Prostate Adenocarcinoma	3.3
SC_9107-Tumor	97115335	6.58792	3.93492	97115335-T-A-1	RoyalMarsden	No	Exposed	YES	Positive	TMPRSS2-ERG		0.49388	0.491622	0.49388	0.0888144	0.114353	0.0888144	Liver	65	9	Adenocarcinoma	Exposed	NA	Matched	PRAD	Prostate Cancer	Prostate Adenocarcinoma	4.36667
SC_9109-Tumor	97115337	1.0031	0.63044	97115337-T-A-1	RoyalMarsden	No	Exposed	YES	Positive	TMPRSS2-ERG		0.564442	0.554089	0.564442	-0.0504799	-0.0165769	-0.0504799	LN	54.6	9	Adenocarcinoma	Exposed	NA	Matched	PRAD	Prostate Cancer	Prostate Adenocarcinoma	3.5
MO_1410-Tumor	5115359	0.0231851	0	5115359	Michigan	No	Naive	YES	Positive	TMPRSS2-ERG		0.163662	0.140104	0.163662	0.219306	0.237645	0.219306	Liver	66	8	Adenocarcinoma	Naive	1	Matched	PRAD	Prostate Cancer	Prostate Adenocarcinoma	3.76667
SC_9105_Tumor	97115333	0.265807	0.345581	97115333-T-C-1	RoyalMarsden	No	Exposed	YES	Positive	TMPRSS2-ERG		0.440939	0.387918	0.440939	0.0497008	0.0641172	0.0497008	Prostate	72.9	9	Adenocarcinoma	Exposed	NA	Matched	PRAD	Prostate Cancer	Prostate Adenocarcinoma	2
SC_9118_Tumor	97115358	3.17381	2.80391	97115358-T-A-1	RoyalMarsden	No	Exposed	YES	Positive	TMPRSS2-ERG		0.39485	0.378113	0.39485	-0.0227215	-0.0354152	-0.0227215	LN	57.2	7	Adenocarcinoma	Exposed	NA	Matched	PRAD	Prostate Cancer	Prostate Adenocarcinoma	5.1
MO_1420_Tumor	5115406	4.10373	11.7915	5115406	Michigan	No	Exposed	YES	Negative			0.557017	0.566414	0.557017	-0.123545	-0.132917	-0.123545	Bone	63	9	Adenocarcinoma	Exposed	NA	Matched	PRAD	Prostate Cancer	Prostate Adenocarcinoma	2.93333
MO_1421_Tumor	5115407	0.0182579	0.086325		Michigan	NA	Naive	YES	Negative			0.2255	0.256528	0.2255	0.0501131	0.0392983	0.0501131	Bone	56	9	Inadequate for diagnosis	Exposed	NA	Matched	PRAD	Prostate Cancer	Prostate Adenocarcinoma	3.26667
TP_2069_Tumor	5115405	0.524038	0.742205	5115405	Michigan	No	Naive	YES	Positive	TMPRSS2-ERG		0.435773	0.518703	0.435773	0.0491165	0.0751918	0.0491165	LN	65.8	9	Adenocarcinoma	Naive	0	Matched	PRAD	Prostate Cancer	Prostate Adenocarcinoma	6.3
SC_9123_Tumor	9115418	2.85917	1.6805	9115418	Washington	No	On treatment	YES	Negative			0.528435	0.523915	0.528435	-0.0717427	-0.026255	-0.0717427	LN	68	9	Adenocarcinoma	Exposed	NA	Matched	PRAD	Prostate Cancer	Prostate Adenocarcinoma	5.03333
SC_9124_Tumor	97115363	2.36026	1.81458	97115363-T-A-1	RoyalMarsden	No	Naive	YES	Positive	TMPRSS2-ERG		0.687895	0.689518	0.687895	0.0101935	0.013924	0.0101935	LN	68.3	6	Adenocarcinoma	Naive	1	Matched	PRAD	Prostate Cancer	Prostate Adenocarcinoma	3.4
SC_9126_Tumor	97115365	0.0402022	0.0204879	97115365-T-B-1	RoyalMarsden	Yes	Exposed	YES	Negative			0.140771	0.130591	0.140771	0.706546	0.67342	0.706546	LN	50	9	Adenocarcinoma with NE features	Exposed	NA	Matched	PRAD	Prostate Cancer	Prostate Adenocarcinoma	3.93333
SC_9129_Tumor	97115368	0.276819	0.209921	97115368-T-A-1	RoyalMarsden	No	Naive	YES	Positive	SLC45A3-ETV1		0.52281	0.506869	0.52281	-0.0987521	-0.0586322	-0.0987521	LN	66.6	7	Adenocarcinoma	Naive	0	Matched	PRAD	Prostate Cancer	Prostate Adenocarcinoma	4.6
SC_9132_Tumor	9115420	7.10747	5.86606	9115420	Washington	No	Exposed	YES	Positive	TMPRSS2-ERG		0.622548	0.631124	0.622548	-0.0723356	-0.0389847	-0.0723356	LN	66	8	Adenocarcinoma	Exposed	NA	Matched	PRAD	Prostate Cancer	Prostate Adenocarcinoma	4.7
MO_1447_Tumor	5115408	0.32141	0.0787063		Michigan	No	Naive	YES	Positive	TMPRSS2-ERG		0.657344	0.644638	0.657344	-0.0340169	-0.00813887	-0.0340169	LN	58	9	Adenocarcinoma	Naive	NA	Matched	PRAD	Prostate Cancer	Prostate Adenocarcinoma	4.56667
MO_1446_T	5115546	0	0		Michigan	No	Naive	YES	Positive	TMPRSS2-ERG		-0.264686	-0.0866745	-0.264686	0.509785	0.34139	0.509785	Bone	57	UNK	Adenocarcinoma	Exposed	NA	Matched	PRAD	Prostate Cancer	Prostate Adenocarcinoma	2.56667
MO_1460_Tumor	5115501	0.0207625	0	5115501	Michigan	Yes	Naive	YES	Negative			0.0424219	-0.0452192	0.0424219	0.850969	0.817264	0.850969	Liver	64	9	Adenocarcinoma with NE features	Naive	NA	Matched	PRAD	Prostate Cancer	Prostate Adenocarcinoma	1.36667
DFCI.11-104.13-Tumor	1115020	0.359639	NA	1115020	DFCI	NA	On treatment	YES	Positive	TMPRSS2-ERG		0.519534	NA	0.519534	-0.0079321	NA	-0.0079321	LN	59	9	Not available	Naive	1	Matched	PRAD	Prostate Cancer	Prostate Adenocarcinoma	1.63333
PRAD-DFCI.11-104.15-Tumor-SM-3S2HH	1115021	0.0728032	NA	1115021	DFCI	NA	Exposed	YES	Negative			0.543088	NA	0.543088	-0.149875	NA	-0.149875	LN	57	UNK	Not available	Naive	NA	Matched	PRAD	Prostate Cancer	Prostate Adenocarcinoma	0.633333
PROS10448-1115150-Tumor-SM-5EEBK	1115150	0	NA	1115150	DFCI	NA	Naive	YES	Negative			0.030781	NA	0.030781	0.369376	NA	0.369376	Bone	71	8	Inadequate for diagnosis	Exposed	NA	Matched	PRAD	Prostate Cancer	Prostate Adenocarcinoma	0.1
PROS10448-1115153-Tumor-SM-5EEBL	1115153	2.14611	NA	1115153	DFCI	NA	Exposed	YES	Positive	CANT1-ETV4		0.470905	NA	0.470905	-0.0889036	NA	-0.0889036	Bone	54	6	Not available	Naive	NA	Matched	PRAD	Prostate Cancer	Prostate Adenocarcinoma	1.46667
PROS10448-1115154-Tumor-SM-5EEBM	1115154	1.25357	NA	1115154	DFCI	No	Exposed	YES	Positive	TMPRSS2-ERG		0.630238	NA	0.630238	-0.0294374	NA	-0.0294374	LN	49	8	Adenocarcinoma	Naive	NA	Matched	PRAD	Prostate Cancer	Prostate Adenocarcinoma	1.33333
PROS10448-1115156-Tumor-SM-5EEBN	1115156	0.908079	NA	1115156	DFCI	No	Naive	YES	Positive	TMPRSS2-ERG		0.575509	NA	0.575509	0.0230356	NA	0.0230356	LN	78	7	Adenocarcinoma	Naive	1	Matched	PRAD	Prostate Cancer	Prostate Adenocarcinoma	1.53333
PROS10448-1115157-Tumor-SM-5EEBO	1115157	1.29254	NA	1115157	DFCI	No	Exposed	YES	Positive	TMPRSS2-ERG		0.502722	NA	0.502722	-0.00864238	NA	-0.00864238	LN	71	7	Adenocarcinoma	Naive	NA	Matched	PRAD	Prostate Cancer	Prostate Adenocarcinoma	1.93333
PROS01448-1115161-Tumor-SM-5SGU1	1115161	2.93464	NA	1115161	DFCI	No	Naive	YES	Negative			0.590437	NA	0.590437	-0.0456245	NA	-0.0456245	LN	67	9	Adenocarcinoma	Naive	1	Matched	PRAD	Prostate Cancer	Prostate Adenocarcinoma	2.3
PROS01448-1115183-Tumor-SM-5SGU3	1115183	0.722323	NA	1115183	DFCI	No	Naive	YES	Positive	TMPRSS2-ERG		0.455751	NA	0.455751	0.0127081	NA	0.0127081	Bone	63	6	Adenocarcinoma	Naive	1	Matched	PRAD	Prostate Cancer	Prostate Adenocarcinoma	1.16667
PROS10448-01115200-Tumor-SM-7LYLF	1115200	0	NA	1115200	DFCI	NA	Exposed	YES	Negative			-0.0159286	NA	-0.0159286	0.376823	NA	0.376823	Bone	78	6	Inadequate for diagnosis	Naive	NA	Matched	PRAD	Prostate Cancer	Prostate Adenocarcinoma	2.1
PROS01448-1115202-Tumor-SM-5SGU5	1115202	5.20803	NA	1115202	DFCI	No	Naive	YES	Negative			0.617909	NA	0.617909	-0.0937186	NA	-0.0937186	LN	70	8	Adenocarcinoma	Naive	1	Matched	PRAD	Prostate Cancer	Prostate Adenocarcinoma	2.33333
PROS01448-1115244-Tumor-SM-5SGU6	1115244	0.0802048	NA	1115244	DFCI	No	Exposed	YES	Positive	TMPRSS2-ERG		0.489188	NA	0.489188	0.0665373	NA	0.0665373	Bone	70	8	Adenocarcinoma	Naive	NA	Matched	PRAD	Prostate Cancer	Prostate Adenocarcinoma	2.63333
PRAD-01115362-Tumor-SM-7A15P	1115362	0.0761271	NA	1115362	DFCI	No	Naive	YES	Negative			0.587452	NA	0.587452	-0.0252926	NA	-0.0252926	LN	72	8	Adenocarcinoma	Naive	1	Matched	PRAD	Prostate Cancer	Prostate Adenocarcinoma	1.36667
PRAD-01115444-Tumor-SM-6B2K9	1115444	1.24529	NA	1115444	DFCI	No	Naive	YES	Negative			0.508552	NA	0.508552	-0.105234	NA	-0.105234	Bone	64	8	Adenocarcinoma	Naive	1	Matched	PRAD	Prostate Cancer	Prostate Adenocarcinoma	1.16667
PRAD-01115467-Tumor-SM-6B2KD	1115467	0.266515	NA	1115467	DFCI	NA	Naive	YES	Positive	TMPRSS2-ERG		0.359569	NA	0.359569	0.267032	NA	0.267032	Bone	66	7	Inadequate for diagnosis	Naive	1	Matched	PRAD	Prostate Cancer	Prostate Adenocarcinoma	2.03333
PRAD-01115468-Tumor-SM-6B2KE	1115468	0	NA	1115468	DFCI	No	Naive	YES	Negative			0.510387	NA	0.510387	0.00771054	NA	0.00771054	Other Soft tissue	77	UNK	Adenocarcinoma	Naive	1	Matched	PRAD	Prostate Cancer	Prostate Adenocarcinoma	19.5
PROS10448-01115374-Tumor-SM-7LYLG	1115503	0.612517	NA		DFCI	No	Exposed	YES	Negative			0.449352	NA	0.449352	-0.0268814	NA	-0.0268814	LN	NA	9	Adenocarcinoma	Naive	NA	Matched	PRAD	Prostate Cancer	Prostate Adenocarcinoma	1.56667
PRAD-01115525-Tumor-SM-A4KNC	1115525	9.18985	NA	1115525	DFCI	No	Exposed	YES	Positive	TMPRSS2-ERG		0.399826	NA	0.399826	0.0830891	NA	0.0830891	Other Soft tissue	74	7	Adenocarcinoma	Naive	NA	Matched	PRAD	Prostate Cancer	Prostate Adenocarcinoma	3.3
PRAD-01115526-Tumor-SM-A4KND	1115526	0	NA	1115526	DFCI	No	Naive	YES	Negative			0.108947	NA	0.108947	0.26258	NA	0.26258	LN	77	8	Adenocarcinoma	Naive	0	Matched	PRAD	Prostate Cancer	Prostate Adenocarcinoma	1.13333
PRAD-01115527-Tumor-SM-A4KNE	1115527	0.0737645	NA	1115527	DFCI	No	Exposed	YES	Negative			0.495018	NA	0.495018	0.148365	NA	0.148365	Bone	58	9	Adenocarcinoma	Exposed	NA	Matched	PRAD	Prostate Cancer	Prostate Adenocarcinoma	4.96667
PRAD-01115531-Tumor-SM-A4KNG	1115531	1.94137	NA	1115531	DFCI	No	Exposed	YES	Negative			0.598741	NA	0.598741	0.0423726	NA	0.0423726	Bone	61	7	Adenocarcinoma	Exposed	NA	Matched	PRAD	Prostate Cancer	Prostate Adenocarcinoma	5.6
PRAD-01115528-Tumor-SM-A4KNF	1115544	4.79227	NA	1115544	DFCI	NA	Naive	YES	Negative			0.529449	NA	0.529449	0.0805615	NA	0.0805615	Bone	63	UNK	Not available	Exposed	NA	Matched	PRAD	Prostate Cancer	Prostate Adenocarcinoma	2.33333
PRAD-01115549-Tumor-SM-A4KNH	1115549	0.321029	NA	1115549	DFCI	No	Naive	YES	Positive	TMPRSS2-ETV4		0.600832	NA	0.600832	-0.0788785	NA	-0.0788785	Bone	76	6	Adenocarcinoma	Naive	1	Matched	PRAD	Prostate Cancer	Prostate Adenocarcinoma	3.56667
PRAD-01115550-Tumor-SM-A4KNI	1115550	2.2698	NA	1115550	DFCI	No	Naive	YES	Negative			0.348268	NA	0.348268	0.020079	NA	0.020079	Bone	60	8	Adenocarcinoma	Naive	0	Matched	PRAD	Prostate Cancer	Prostate Adenocarcinoma	2
PRAD-01115554-Tumor-SM-A56E4	1115554	0.887419	NA	1115554	DFCI	No	Naive	YES	Negative			0.48298	NA	0.48298	0.0150003	NA	0.0150003	Bone	58	7	Adenocarcinoma	Naive	1	Matched	PRAD	Prostate Cancer	Prostate Adenocarcinoma	1.6
PRAD-01115556-Tumor-SM-A56E5	1115556	9.00386	NA	1115556	DFCI	No	Exposed	YES	Positive	TMPRSS2-ERG		0.610715	NA	0.610715	-0.0865081	NA	-0.0865081	Other Soft tissue	79	7	Adenocarcinoma	Naive	NA	Matched	PRAD	Prostate Cancer	Prostate Adenocarcinoma	2.7
PRAD-01115569-Tumor-SM-A56E6	1115569	0.265415	NA	1115569	DFCI	No	Exposed	YES	Positive	SLC45A3-ETV1		0.595066	NA	0.595066	-0.11814	NA	-0.11814	Bone	54	8	Adenocarcinoma	Naive	NA	Matched	PRAD	Prostate Cancer	Prostate Adenocarcinoma	3.66667
PRAD-01115574-Tumor-SM-A56E7	1115574	0.544956	NA	1115574	DFCI	No	Naive	YES	Positive	TMPRSS2-ERG		0.555146	NA	0.555146	-0.0972994	NA	-0.0972994	LN	57	7	Adenocarcinoma	Exposed	NA	Matched	PRAD	Prostate Cancer	Prostate Adenocarcinoma	3.16667
PRAD-01115576-Tumor-SM-A56E8	1115576	0	NA	1115576	DFCI	No	On treatment	YES	Positive	TMPRSS2-ERG		0.133679	NA	0.133679	0.717098	NA	0.717098	Liver	66	8	Adenocarcinoma	Exposed	NA	Matched	PRAD	Prostate Cancer	Prostate Adenocarcinoma	1.83333
PRAD-01115577-Tumor-SM-A56E9	1115577	1.30884	NA	1115577	DFCI	NA	Exposed	YES	Negative			0.301691	NA	0.301691	0.00762408	NA	0.00762408	Bone	61	9	Not available	Exposed	NA	Matched	PRAD	Prostate Cancer	Prostate Adenocarcinoma	7.6
PRAD-01115578-Tumor-SM-A56EA	1115578	0	NA	1115578	DFCI	NA	Exposed	YES	Positive	chr14_q21.1-ETV11		0.235028	NA	0.235028	-0.0191138	NA	-0.0191138	Bone	76.7	9	Inadequate for diagnosis	Naive	NA	Matched	PRAD	Prostate Cancer	Prostate Adenocarcinoma	2.23333
PRAD-01115581-Tumor-SM-A56EB	1115581	3.46055	NA	1115581	DFCI	No	Exposed	YES	Negative			0.515945	NA	0.515945	0.0434291	NA	0.0434291	Bone	64	9	Adenocarcinoma	Exposed	NA	Matched	PRAD	Prostate Cancer	Prostate Adenocarcinoma	2.26667
PROS12319B-SU2C-06115114-Tumor-SM-4W2N9	6115114	0.304409	NA	6115114	MSK	Yes	Naive	YES	Positive	ACPP-ETV1		0.563527	NA	0.563527	-0.117297	NA	-0.117297	Other Soft tissue	81	UNK	Adenocarcinoma with NE features	Naive	1	Matched	PRAD	Prostate Cancer	Prostate Adenocarcinoma	6.16667
PROS12319B-SU2C-06115115-Tumor-SM-4W2NA	6115115	0.844695	NA	6115115	MSK	No	Exposed	YES	Positive	TMPRSS2-ETV4		0.466572	NA	0.466572	-0.08539	NA	-0.08539	LN	79	9	Adenocarcinoma	Naive	NA	Matched	PRAD	Prostate Cancer	Prostate Adenocarcinoma	3.13333
PROS12319B-SU2C-06115116-Tumor-SM-4W2NB	6115116	0	NA	6115116	MSK	Yes	Naive	YES	Negative			-0.121846	NA	-0.121846	0.53627	NA	0.53627	Liver	83	7	Small cell	Naive	1	Matched	PRAD	Prostate Cancer	Prostate Adenocarcinoma	2.43333
PROS12319B-SU2C-06115117-Tumor-SM-4W2NC	6115117	0.0939815	NA	6115117	MSK	No	Exposed	YES	Positive	TMPRSS2-ERG		0.397585	NA	0.397585	0.00929244	NA	0.00929244	Other Soft tissue	67	7	Adenocarcinoma	Exposed	NA	Matched	PRAD	Prostate Cancer	Prostate Adenocarcinoma	1.8
PROS12319B-SU2C-06115118-Tumor-SM-4W2ND	6115118	12.8648	NA	6115118	MSK	No	Exposed	YES	Positive	SLC45A3-ETV1		0.427522	NA	0.427522	-0.0447223	NA	-0.0447223	Bone	69	9	Adenocarcinoma	Exposed	NA	Matched	PRAD	Prostate Cancer	Prostate Adenocarcinoma	1.63333
PROS12319B-SU2C-06115119-Tumor-SM-4W2NE	6115119	0	NA	6115119	MSK	NA	Exposed	YES	Negative			0.115747	NA	0.115747	0.23695	NA	0.23695	Liver	87	8	Inadequate for diagnosis	Naive	NA	Matched	PRAD	Prostate Cancer	Prostate Adenocarcinoma	4.23333
PROS12319B-SU2C-06115121-Tumor-SM-4W2NG	6115121	0.4177	NA	6115121	MSK	Yes	On treatment	YES	Positive	TMPRSS2-ERG		0.56203	NA	0.56203	-0.0282657	NA	-0.0282657	LN	55	7	Small cell	Naive	1	Matched	PRAD	Prostate Cancer	Prostate Adenocarcinoma	1.86667
PROS12319B-SU2C-06115122-Tumor-SM-4W2NH	6115122	2.08384	NA	6115122	MSK	No	On treatment	YES	Positive	TMPRSS2-ERG		0.341486	NA	0.341486	0.037822	NA	0.037822	LN	55	9	Adenocarcinoma	Naive	NA	Matched	PRAD	Prostate Cancer	Prostate Adenocarcinoma	1.73333
PROS12319B-SU2C-06115123-Tumor-SM-4W2NI	6115123	1.05729	NA	6115123	MSK	No	Exposed	YES	Negative			0.299056	NA	0.299056	-0.0468666	NA	-0.0468666	LN	62	8	Adenocarcinoma	Exposed	NA	Matched	PRAD	Prostate Cancer	Prostate Adenocarcinoma	1.53333
PRAD-06115124-Tumor-SM-7LGU1	6115124	0	NA	6115124	MSK	No	Naive	YES	Positive	TMPRSS2-ERG		0.244096	NA	0.244096	0.0915888	NA	0.0915888	Other Soft tissue	74.1	9	Adenocarcinoma	Naive	NA	Matched	PRAD	Prostate Cancer	Prostate Adenocarcinoma	0.966667
PROS01448-6115219-Tumor-SM-67ERS	6115219	0.615534	NA	6115219	MSK	No	Exposed	YES	Positive	SLC45A3-ERG		0.502721	NA	0.502721	0.0459967	NA	0.0459967	Other Soft tissue	68	7	Adenocarcinoma	Naive	NA	Matched	PRAD	Prostate Cancer	Prostate Adenocarcinoma	2.8
PROS01448-6115224-Tumor-SM-67ERT	6115224	2.92369	NA	6115224	MSK	No	Exposed	YES	Positive	TMPRSS2-ETV4		0.524093	NA	0.524093	-0.0750795	NA	-0.0750795	Bone	79	7	Adenocarcinoma	Exposed	NA	Matched	PRAD	Prostate Cancer	Prostate Adenocarcinoma	2.36667
PROS01448-6115227-Tumor-SM-67ERU	6115227	0.0418716	NA	6115227	MSK	No	Exposed	YES	Negative			0.533964	NA	0.533964	-0.0502224	NA	-0.0502224	Other Soft tissue	81	8	Adenocarcinoma	Exposed	NA	Matched	PRAD	Prostate Cancer	Prostate Adenocarcinoma	2.56667
PROS01448-6115233-Tumor-SM-67ERW	6115233	8.22564	NA	6115233	MSK	No	Exposed	YES	Negative			0.523211	NA	0.523211	-0.0747116	NA	-0.0747116	LN	84	UNK	Adenocarcinoma	Exposed	NA	Matched	PRAD	Prostate Cancer	Prostate Adenocarcinoma	2.23333
PROS01448-6115234-Tumor-SM-67ERX	6115234	1.04878	NA	6115234	MSK	No	Naive	YES	Positive	TMPRSS2-ERG		0.594908	NA	0.594908	-0.0656706	NA	-0.0656706	LN	66	9	Adenocarcinoma	Naive	1	Matched	PRAD	Prostate Cancer	Prostate Adenocarcinoma	1.76667
PROS01448-6115235-Tumor-SM-67ERY	6115235	0	NA	6115235	MSK	No	Naive	YES	Negative			0.227819	NA	0.227819	-0.0622745	NA	-0.0622745	LN	80	7	Adenocarcinoma	Naive	1	Matched	PRAD	Prostate Cancer	Prostate Adenocarcinoma	4.6
PROS01448-6115237-Tumor-SM-67ERZ	6115237	0	NA	6115237	MSK	Yes	Naive	YES	Negative			0.217075	NA	0.217075	0.574681	NA	0.574681	Liver	81	UNK	Adenocarcinoma with NE features	Naive	NA	Matched	PRAD	Prostate Cancer	Prostate Adenocarcinoma	2.86667
PROS01448-6115242-Tumor-SM-67ES1	6115242	4.03435	NA	6115242	MSK	No	On treatment	YES	Negative			0.556973	NA	0.556973	-0.148904	NA	-0.148904	Bone	65	UNK	Adenocarcinoma	Naive	1	Matched	PRAD	Prostate Cancer	Prostate Adenocarcinoma	1.56667
PROS01448-6115247-Tumor-SM-67ES2	6115247	0.69739	NA	6115247	MSK	No	Naive	YES	Positive	TMPRSS2-ERG		0.512147	NA	0.512147	-0.052776	NA	-0.052776	LN	61	7	Adenocarcinoma	Naive	1	Matched	PRAD	Prostate Cancer	Prostate Adenocarcinoma	1.03333
PRAD-6115250.0-Tumor-SM-B2XRX	6115250	0.0172892	NA	6115250	MSK	NA	Exposed	YES	Negative			NA	NA	NA	NA	NA	NA	LN	71	9	Not available	Naive	NA	Matched	PRAD	Prostate Cancer	Prostate Adenocarcinoma	2.96667
PROS01448-6115250-Tumor-SM-67ES5	6115250	0.0551549	NA	6115250	MSK	No	Exposed	YES	Negative			NA	NA	NA	NA	NA	NA	LN	70	9	Adenocarcinoma	Naive	NA	Matched	PRAD	Prostate Cancer	Prostate Adenocarcinoma	3.3
PROS01448-6115251-Tumor-SM-67ES6	6115251	0.680099	NA	6115251	MSK	No	Naive	YES	Negative			0.534051	NA	0.534051	-0.0909106	NA	-0.0909106	LN	71	9	Adenocarcinoma	Naive	1	Matched	PRAD	Prostate Cancer	Prostate Adenocarcinoma	1.36667
PRAD-6115296.0-Tumor-SM-B2XS2	6115296	0.0493349	NA	6115296	MSK	NA	Exposed	YES	Negative			0.0556804	NA	0.0556804	0.414386	NA	0.414386	Liver	74.2	9	Not available	Exposed	NA	Matched	PRAD	Prostate Cancer	Prostate Adenocarcinoma	1.8
PRAD-6115381.0-Tumor-SM-7LGU3	6115381	0	NA	6115381	MSK	Yes	Naive	YES	Negative			-0.0823315	NA	-0.0823315	0.549467	NA	0.549467	Other Soft tissue	60	8	Small cell	Naive	NA	Matched	PRAD	Prostate Cancer	Prostate Adenocarcinoma	1.53333
PRAD-6115382.0-Tumor-SM-7LGU5	6115382	0	NA	6115382	MSK	No	On treatment	YES	Negative			0.0259552	NA	0.0259552	0.2362	NA	0.2362	Lung	71	8	Adenocarcinoma	Naive	NA	Matched	PRAD	Prostate Cancer	Prostate Adenocarcinoma	2.03333
PRAD-6115385.0-Tumor-SM-7LGU7	6115385	9.90876	NA	6115385	MSK	No	Exposed	YES	Negative			0.50673	NA	0.50673	-0.0738828	NA	-0.0738828	LN	62	UNK	Adenocarcinoma	Exposed	NA	Matched	PRAD	Prostate Cancer	Prostate Adenocarcinoma	3.9
PRAD-6115388.0-Tumor-SM-7LGUA	6115388	0.13833	NA	6115388	MSK	Yes	Naive	YES	Positive	TMPRSS2-ETV4		0.379236	NA	0.379236	0.0848714	NA	0.0848714	Other Soft tissue	77	7	Small cell	Exposed	NA	Matched	PRAD	Prostate Cancer	Prostate Adenocarcinoma	2.6
PRAD-6115390.0-Tumor-SM-7LGUC	6115390	0	NA	6115390	MSK	NA	Exposed	YES	Negative			0.0395326	NA	0.0395326	0.778789	NA	0.778789	Liver	68	7	Inadequate for diagnosis	Exposed	NA	Matched	PRAD	Prostate Cancer	Prostate Adenocarcinoma	3.8
PRAD-6115391.0-Tumor-SM-7LGUD	6115391	3.20352	NA	6115391	MSK	No	Exposed	YES	Positive	TMPRSS2-ERG		0.413144	NA	0.413144	0.0263618	NA	0.0263618	LN	69	7	Adenocarcinoma	Naive	NA	Matched	PRAD	Prostate Cancer	Prostate Adenocarcinoma	3.96667
PRAD-6115392.0-Tumor-SM-B2XRZ	6115392	0.0401153	NA	6115392	MSK	No	Exposed	YES	Negative			0.299735	NA	0.299735	0.338518	NA	0.338518	LN	64.6	7	Adenocarcinoma	Naive	NA	Matched	PRAD	Prostate Cancer	Prostate Adenocarcinoma	2.73333
PRAD-6115393.0-Tumor-SM-7LGUF	6115393	0.0690977	NA	6115393	MSK	Yes	Exposed	YES	Positive	chr14_q21.1-ETV1		0.492547	NA	0.492547	-0.0671775	NA	-0.0671775	Lung	69	10	Adenocarcinoma with NE features	Naive	NA	Matched	PRAD	Prostate Cancer	Prostate Adenocarcinoma	1.46667
PRAD-6115395.0-Tumor-SM-7LGUH	6115395	6.78999	NA	6115395	MSK	No	On treatment	YES	Positive	TMPRSS2-ERG		0.502621	NA	0.502621	-0.0259393	NA	-0.0259393	Bone	61	8	Adenocarcinoma	Naive	1	Matched	PRAD	Prostate Cancer	Prostate Adenocarcinoma	1.7
PRAD-6115396.0-Tumor-SM-7LGUI	6115396	7.05709	NA	6115396	MSK	No	Exposed	YES	Negative			0.565473	NA	0.565473	-0.0919702	NA	-0.0919702	LN	64	7	Adenocarcinoma	Naive	NA	Matched	PRAD	Prostate Cancer	Prostate Adenocarcinoma	2.26667
PRAD-6115397.0-Tumor-SM-7LGUJ	6115397	0.446517	NA	6115397	MSK	No	Exposed	YES	Negative			0.438255	NA	0.438255	0.0949744	NA	0.0949744	Liver	84	UNK	Adenocarcinoma	Naive	NA	Matched	PRAD	Prostate Cancer	Prostate Adenocarcinoma	2.23333
PRAD-6115398.0-Tumor-SM-7LGUK	6115398	0.29671	NA	6115398	MSK	No	Exposed	YES	Positive	TMPRSS2-ERG		0.574098	NA	0.574098	0.105406	NA	0.105406	LN	84	9	Adenocarcinoma	UNK	NA	Matched	PRAD	Prostate Cancer	Prostate Adenocarcinoma	2.56667
PRAD-6115399.0-Tumor-SM-7LGUL	6115399	2.00384	NA	6115399	MSK	No	Naive	YES	Negative			0.420475	NA	0.420475	0.036395	NA	0.036395	LN	61	9	Adenocarcinoma	Naive	1	Matched	PRAD	Prostate Cancer	Prostate Adenocarcinoma	3.56667
PRAD-6115400.0-Tumor-SM-7LGUM	6115400	1.38727	NA	6115400	MSK	No	Exposed	YES	Positive	TMPRSS2-ERG		0.398497	NA	0.398497	-0.0528303	NA	-0.0528303	LN	73	9	Adenocarcinoma	Exposed	NA	Matched	PRAD	Prostate Cancer	Prostate Adenocarcinoma	1.16667
PRAD-6115400.0-Tumor-SM-7LGUN	6115400	1.86627	NA	6115400	MSK	No	Exposed	YES	Positive	TMPRSS2-ERG		0.445073	NA	0.445073	-0.0614744	NA	-0.0614744	LN	73.1	9	Adenocarcinoma	Exposed	NA	Matched	PRAD	Prostate Cancer	Prostate Adenocarcinoma	1.13333
PRAD-6115402.0-Tumor-SM-7LGUP	6115402	4.20933	NA	6115402	MSK	No	Exposed	YES	Positive	MSMB-ERG		0.501454	NA	0.501454	-0.126477	NA	-0.126477	LN	72	UNK	Adenocarcinoma	Exposed	NA	Matched	PRAD	Prostate Cancer	Prostate Adenocarcinoma	1.53333
PRAD-6115427.0-Tumor-SM-B2XRT	6115427	6.09536	NA	6115427	MSK	No	Exposed	YES	Negative			0.635018	NA	0.635018	-0.0450236	NA	-0.0450236	Bone	57.5	UNK	Adenocarcinoma	UNK	NA	Matched	PRAD	Prostate Cancer	Prostate Adenocarcinoma	6.06667
PRAD-6115590.0-Tumor-SM-B2XRS	6115590	2.84802	NA	6115590	MSK	NA	Naive	YES	Negative			0.603667	NA	0.603667	-0.0543805	NA	-0.0543805	Lung	61	UNK	Inadequate for diagnosis	Naive	1	Matched	PRAD	Prostate Cancer	Prostate Adenocarcinoma	12.7
PRAD-6115592.0-Tumor-SM-B2XRU	6115592	0	NA	6115592	MSK	No	Exposed	YES	Negative			0.211875	NA	0.211875	0.252084	NA	0.252084	Liver	70	UNK	Adenocarcinoma	Naive	NA	Matched	PRAD	Prostate Cancer	Prostate Adenocarcinoma	2.56667
PRAD-6115593.0-Tumor-SM-B2XRV	6115593	0.152416	NA	6115593	MSK	No	Exposed	YES	Negative			0.5001	NA	0.5001	-0.0577877	NA	-0.0577877	Liver	67	UNK	Adenocarcinoma	Exposed	NA	Matched	PRAD	Prostate Cancer	Prostate Adenocarcinoma	2.96667
PRAD-6115594.0-Tumor-SM-B2XRW	6115594	0.227667	NA	6115594	MSK	No	Naive	YES	Positive	SLC45A3-ETV1		0.623257	NA	0.623257	-0.038586	NA	-0.038586	LN	62	UNK	Adenocarcinoma	Naive	1	Matched	PRAD	Prostate Cancer	Prostate Adenocarcinoma	1.56667
PRAD-6115595.0-Tumor-SM-B2XRY	6115595	7.47496	NA	6115595	MSK	No	Naive	YES	Negative			0.549378	NA	0.549378	-0.01815	NA	-0.01815	LN	77	UNK	Adenocarcinoma	Naive	1	Matched	PRAD	Prostate Cancer	Prostate Adenocarcinoma	2.7
PRAD-6115596.0-Tumor-SM-B2XS1	6115596	9.49868	NA	6115596	MSK	No	Exposed	YES	Positive	HNRNPH1-ETV4		0.581982	NA	0.581982	-0.0531363	NA	-0.0531363	Lung	64	UNK	Adenocarcinoma	Naive	NA	Matched	PRAD	Prostate Cancer	Prostate Adenocarcinoma	1.4
PRAD-6115597.0-Tumor-SM-B2XS5	6115597	3.48202	NA	6115597	MSK	NA	Naive	YES	Positive	TMPRSS2-ERG		0.400229	NA	0.400229	-0.0632473	NA	-0.0632473	LN	65	UNK	Inadequate for diagnosis	UNK	NA	Matched	PRAD	Prostate Cancer	Prostate Adenocarcinoma	2.06667
PRAD-6115598.0-Tumor-SM-B2XS3	6115598	4.80217	NA	6115598	MSK	No	Exposed	YES	Positive	TMPRSS2-ETV5		0.562281	NA	0.562281	-0.075742	NA	-0.075742	LN	73	UNK	Adenocarcinoma	Exposed	NA	Matched	PRAD	Prostate Cancer	Prostate Adenocarcinoma	3.26667
PRAD-6115599.0-Tumor-SM-B2XS4	6115599	1.33965	NA	6115599	MSK	No	Exposed	YES	Negative			0.313455	NA	0.313455	0.00037836	NA	0.00037836	LN	74.1	UNK	Adenocarcinoma	Naive	NA	Matched	PRAD	Prostate Cancer	Prostate Adenocarcinoma	2.36667
PRAD-6115600.0-Tumor-SM-B2XS6	6115600	3.39509	NA	6115600	MSK	No	Naive	YES	Positive	TMPRSS2-ERG		0.382203	NA	0.382203	-0.0287061	NA	-0.0287061	LN	56	UNK	Adenocarcinoma	Naive	NA	Matched	PRAD	Prostate Cancer	Prostate Adenocarcinoma	1.66667
PRAD-6115601.0-Tumor-SM-B2XS7	6115601	0.520875	NA	6115601	MSK	No	Exposed	YES	Positive	TMPRSS2-ERG		0.588159	NA	0.588159	0.00805168	NA	0.00805168	LN	47	UNK	Adenocarcinoma	Exposed	NA	Matched	PRAD	Prostate Cancer	Prostate Adenocarcinoma	1.66667
PRAD-6115603.0-Tumor-SM-B2XS8	6115603	0	NA	6115603	MSK	No	Exposed	YES	Negative			0.532441	NA	0.532441	-0.1043	NA	-0.1043	Bone	66	UNK	Adenocarcinoma	UNK	NA	Matched	PRAD	Prostate Cancer	Prostate Adenocarcinoma	2.8
PRAD-6115604.0-Tumor-SM-B2XS9	6115604	0.0944511	NA	6115604	MSK	No	Naive	YES	Negative			0.447393	NA	0.447393	-0.00787485	NA	-0.00787485	Lung	57	UNK	Adenocarcinoma	UNK	NA	Matched	PRAD	Prostate Cancer	Prostate Adenocarcinoma	4.46667
PRAD-6115605.0-Tumor-SM-B2XSA	6115605	0.0339049	NA	6115605	MSK	Yes	Exposed	YES	Negative			0.328912	NA	0.328912	-0.00262763	NA	-0.00262763	LN	59	UNK	Adenocarcinoma with NE features	Naive	1	Matched	PRAD	Prostate Cancer	Prostate Adenocarcinoma	2.06667
PM14-TM	96115135	0.757743	NA	96115135-T-A-1	Cornell	No	Naive	YES	Positive	CCAR-ETV1		0.392857	NA	0.392857	-0.0234912	NA	-0.0234912	Prostate	64	9	Adenocarcinoma	Naive	1	Matched	PRAD	Prostate Cancer	Prostate Adenocarcinoma	1.6
PM2-TM	96115137	1.45887	NA	96115137-T-A-1	Cornell	No	Exposed	YES	Negative			0.406177	NA	0.406177	0.00699201	NA	0.00699201	LN	73	8	Adenocarcinoma	Exposed	NA	Matched	PRAD	Prostate Cancer	Prostate Adenocarcinoma	1.46667
WCM91_Z1	96115138	4.52849	NA	96115138	Cornell	No	Exposed	YES	Negative			0.61048	NA	0.61048	-0.0146482	NA	-0.0146482	Prostate	57	9	Adenocarcinoma	Naive	NA	Matched	PRAD	Prostate Cancer	Prostate Adenocarcinoma	0.566667
PM90-TM	96115139	0	NA	96115139-T-C-1	Cornell	No	Exposed	YES	Negative			0.424063	NA	0.424063	0.0598683	NA	0.0598683	Liver	62	7	Adenocarcinoma	Exposed	NA	Matched	PRAD	Prostate Cancer	Prostate Adenocarcinoma	1.2
PM119-TM	96115141	4.59848	NA	96115141-T-C-1	Cornell	No	Exposed	YES	Negative			0.665633	NA	0.665633	-0.106971	NA	-0.106971	LN	66.1	8	Adenocarcinoma	Exposed	NA	Matched	PRAD	Prostate Cancer	Prostate Adenocarcinoma	1.1
PM155-TM	96115165	0	NA	96115165-T-A-1	Cornell	Yes	Naive	YES	Negative			0.00164229	NA	0.00164229	0.684754	NA	0.684754	Liver	87	UNK	Small cell	Naive	NA	Matched	PRAD	Prostate Cancer	Prostate Adenocarcinoma	1.33333
PM139-TM	96115204	1.21352	NA	96115204-T-A-1	Cornell	No	Exposed	YES	Negative			0.501056	NA	0.501056	-0.0243497	NA	-0.0243497	Bone	77	9	Adenocarcinoma	Naive	NA	Matched	PRAD	Prostate Cancer	Prostate Adenocarcinoma	1.63333
PM158-TM	96115207	0.15463	NA	96115207-T-A-1	Cornell	No	Naive	YES	Negative			0.388262	NA	0.388262	0.115641	NA	0.115641	Bone	65	7	Adenocarcinoma	Naive	0	Matched	PRAD	Prostate Cancer	Prostate Adenocarcinoma	1.4
PM159-TM	96115208	0	NA	96115208-T-C-1	Cornell	No	Exposed	YES	Negative			0.513493	NA	0.513493	-0.0186101	NA	-0.0186101	Lung	64	8	Adenocarcinoma	Exposed	NA	Matched	PRAD	Prostate Cancer	Prostate Adenocarcinoma	0.8
PM161-TM	96115209	8.66534	NA	96115209-T-A-1	Cornell	Yes	Exposed	YES	Positive	TMPRSS2-ERG		0.499632	NA	0.499632	-0.0742012	NA	-0.0742012	Liver	66.6	7	Small cell	Naive	NA	Matched	PRAD	Prostate Cancer	Prostate Adenocarcinoma	1.73333
PM163-TM	96115210	0.15197	NA	96115210-T-C-1	Cornell	Yes	Exposed	YES	Negative			0.241857	NA	0.241857	0.563035	NA	0.563035	Liver	67	9	Small cell	Naive	NA	Matched	PRAD	Prostate Cancer	Prostate Adenocarcinoma	1.23333
PM170-TM	96115211	0	NA	96115211-T-C-1	Cornell	No	On treatment	YES	Negative			0.139054	NA	0.139054	0.297676	NA	0.297676	Bone	70	8	Adenocarcinoma	Exposed	NA	Matched	PRAD	Prostate Cancer	Prostate Adenocarcinoma	1.16667
PM172-TM	96115213	2.17626	NA	96115213-T-C-1	Cornell	No	On treatment	YES	Negative			0.460535	NA	0.460535	0.0266986	NA	0.0266986	Bone	68.2	8	Adenocarcinoma	Exposed	NA	Matched	PRAD	Prostate Cancer	Prostate Adenocarcinoma	1.16667
PM189-TM	96115214	2.21647	NA	96115214-T-C-1	Cornell	No	Exposed	YES	Negative			0.317586	NA	0.317586	0.100398	NA	0.100398	LN	85	9	Adenocarcinoma	Naive	NA	Matched	PRAD	Prostate Cancer	Prostate Adenocarcinoma	1.66667
WCM4_X1	96115266	0	NA	96115266	Cornell	No	Exposed	YES	Negative			0.371245	NA	0.371245	-0.0439226	NA	-0.0439226	Bone	59	10	Adenocarcinoma	Exposed	NA	Matched	PRAD	Prostate Cancer	Prostate Adenocarcinoma	0.266667
WCM218_Z3	96115269	0	NA	96115269	Cornell	No	Exposed	YES	Positive	chr14_q21.1-ETV1		0.458817	NA	0.458817	0.0764713	NA	0.0764713	Bone	64	7	Adenocarcinoma	Exposed	NA	Matched	PRAD	Prostate Cancer	Prostate Adenocarcinoma	0.9
WCM210_Z2	96115272	0	NA	96115272	Cornell	Yes	Exposed	YES	Negative			-0.175828	NA	-0.175828	0.814244	NA	0.814244	LN	81	8	Small cell	Exposed	NA	Matched	PRAD	Prostate Cancer	Prostate Adenocarcinoma	0.7
WCM209_Z2	96115273	6.658	NA	96115273	Cornell	No	Naive	YES	Negative			0.595327	NA	0.595327	-0.0044808	NA	-0.0044808	LN	53	7	Adenocarcinoma	Exposed	NA	Matched	PRAD	Prostate Cancer	Prostate Adenocarcinoma	2.2
WCM335_X1	96115473	0.502207	NA	96115473	Cornell	No	Naive	YES	Positive	TMPRSS2-ERG		0.370352	NA	0.370352	-0.0389727	NA	-0.0389727	Bone	53	7	Adenocarcinoma	Naive	0	Matched	PRAD	Prostate Cancer	Prostate Adenocarcinoma	1.26667
WCM258_Z2	96115474	0.634351	NA	96115474	Cornell	No	Exposed	YES	Positive	TMPRSS2-ERG		0.49638	NA	0.49638	-0.0616002	NA	-0.0616002	LN	69	7	Adenocarcinoma	Naive	NA	Matched	PRAD	Prostate Cancer	Prostate Adenocarcinoma	2.03333
WCM252_Z3	96115480	0	NA	96115480	Cornell	Yes	Naive	YES	Negative			-0.0261184	NA	-0.0261184	0.914879	NA	0.914879	Liver	68	7	Small cell	Naive	NA	Matched	PRAD	Prostate Cancer	Prostate Adenocarcinoma	0.3
WCM89_X1	96115494	2.20061	NA	96115494	Cornell	No	Exposed	YES	Positive	TMPRSS2-ERG		0.630946	NA	0.630946	-0.0629753	NA	-0.0629753	LN	55	9	Adenocarcinoma	Exposed	NA	Matched	PRAD	Prostate Cancer	Prostate Adenocarcinoma	0.333333
WCM393_Z3	96115496	1.16065	NA	96115496	Cornell	No	Naive	YES	Negative			0.702218	NA	0.702218	-0.13666	NA	-0.13666	Bone	82	7	Adenocarcinoma	Exposed	NA	Matched	PRAD	Prostate Cancer	Prostate Adenocarcinoma	0.833333
WCM573_X1	96115619	0	NA	96115619	Cornell	Yes	UNK	YES	Negative			0.0588791	NA	0.0588791	0.813584	NA	0.813584	Other Soft tissue	75	6	Small cell	Exposed	NA	Matched	PRAD	Prostate Cancer	Prostate Adenocarcinoma	0.766667
WCM665_X1	96115641	0	NA	96115641	Cornell	Yes	Naive	YES	Negative			0.0423862	NA	0.0423862	0.808818	NA	0.808818	Liver	55	10	Small cell	Naive	NA	Matched	PRAD	Prostate Cancer	Prostate Adenocarcinoma	0.9
WCM666_X1	96115642	1.7364	NA	96115642	Cornell	Yes	Exposed	YES	Negative		TMPRSS2-BRAF	0.389604	NA	0.389604	0.0143469	NA	0.0143469	LN	56	7	Small cell	Exposed	NA	Matched	PRAD	Prostate Cancer	Prostate Adenocarcinoma	0.5
